# Supplementary material
Source: PubMed Central journal article supplement (PMC4480364)
Supplement: NIHMS465864-supplement-Table_S1__S2.pdf [file NIHMS465864-supplement-Table_S1__S2.pdf]

## Anabolic transcriptional changes in bone of hibernating black bears (*Ursus americanus*)

Vadim B. Fedorov, Anna V. Goropashnaya, Øivind Tøien, Nathan C. Stewart, Celia Chang, Haifang Wang, Jun Yan, Louise C. Showe, Michael K. Showe, Seth W. Donahue and Brian M. Barnes

**Table S1** Primer sequences used for the real-time PCR tests in this study

| Gene Symbol    | Forward                        | Reverse                       |
|----------------|--------------------------------|-------------------------------|
| <i>B4galt6</i> | CAT TGC AAA TGG AGG TTC TTT    | CCT CGC ATT GCA CTT GAT AC    |
| <i>Cav1</i>    | GTC TGA CCT TGG GGA CGT TA     | TGT CCA TGC CAG TGT CTG TT    |
| <i>Cd47</i>    | ATC TCG TGA AGG AGA AAA CCA T  | ATT AAA CCA AGT CCG CAA GAA T |
| <i>Cfl1</i>    | TCT TCT GGG CAC CTG AGT CT     | ATC CCC GTC AGC TTT TTC TT    |
| <i>Dcn</i>     | CCT CCT GCT TGC ACA AGT TT     | GCC TAT CCC AGA AGC CTC AT    |
| <i>Ect2</i>    | GGT GAT TTT AGC CAC TAG CAA AT | CAC AAT TTC CCC ATG GTC TTA C |
| <i>Fn1</i>     | CTC CAC TGG CCA CTA CAA CC     | CGG GAA TCT TCT CTG TCA GC    |
| <i>Gpc3</i>    | TCC CCA AGC TTA TCA TGA CC     | AGT CCC TGG CAG TAA GAG CA    |
| <i>Hoxa10</i>  | AGG TCT TGC ATT GTG GGA CT     | GGG AGA ATT GTG GTG TGC TT    |
| <i>Lnpep</i>   | CAG ATG CAC CTT TAC CAA AGA A  | AGT TCG TAG CGT AGT GGC ATA A |
| <i>Mapk8</i>   | CTG ATC GTT CCT GGT GTG TG     | TTA CGG GAA AGT CTG CTG CT    |
| <i>Mef2c</i>   | CAG CCA CTT GAA CCC TCA AT     | GCA GGA AAT TAA CGC CAT GT    |
| <i>Omg</i>     | CCA TCT GGA CTG CAA GAG AA     | GGC TTT CAA GCC TGT TGT TT    |
| <i>Prrx1</i>   | TGC ACT TTC AGC ACA CAT TT     | TTC AGA TTG GTG GCT GTT TG    |
| <i>Sdc2</i>    | TGG AAA CCA CGA CAC TGA AG     | AGC TGG GTC CAT TTT CCT TT    |
| <i>Srgn</i>    | TGG ATC TGG AAG TGG TTC TG     | GGA CCA AGT CCT GGT TGT CT    |

|               |                             |                             |
|---------------|-----------------------------|-----------------------------|
| <i>Timp2</i>  | GCA ATG TGT TTT TGC TGG AC  | CCG AGC GAT CAC TCA AGA AT  |
| <i>Ube2d3</i> | TTG GAA GTC AAA CAC CCT TTG | AGC TCC AAG CCT CCT AAC AA  |
| <i>Yap1</i>   | AGG AAC AAA ATG AGC ATG GA  | GCC ACT CTA ACT CAC GAC CAG |
| <i>Zeb1</i>   | TGA GGG AGA AGA GGC AAA AA  | TTC AGA CAC CTG CTC GCT ATT |
| <i>Hint1</i>  | CCC TCA AGC ACC AAC TCA TT  | CCA GAT CAG CAG CAC ATT TC  |

**Table S2** List of differentially expressed genes identified in this study. Listed genes demonstrate significant expression differences between hibernating and summer active black bears in bone tissue. Genes are ranked by log<sub>2</sub>FC (Fold Change), P is a significance level. Positive significant genes are up-regulated (positive values of log<sub>2</sub>FC) and negative significant genes are down-regulated (negative values of log<sub>2</sub>FC) in hibernating animals. Differentially expressed genes with P<0.01 are in bold. Complete description of the black bear EST collection can be found in The Black Bear Gene Index at [http://compbio.dfci.harvard.edu/tgi/cgi-bin/tgi/T\\_release.pl?gudb=bear](http://compbio.dfci.harvard.edu/tgi/cgi-bin/tgi/T_release.pl?gudb=bear)

| Symbol               | Gene name                                                 | Array | Clone_ID                     | P value | Log <sub>2</sub> FC |
|----------------------|-----------------------------------------------------------|-------|------------------------------|---------|---------------------|
| <i>Peg3</i>          | Paternally expressed 3                                    | BA002 | 007_009_B11                  | 0.012   | 2.080               |
| <i>Ndrp2</i>         | NDRG family member 2                                      | BA002 | 005-012A_B09_2006-11-15      | 0.049   | 1.973               |
| <i>Gpc3</i>          | Glypican 3                                                | BA002 | 008_031_O10                  | 0.012   | 1.922               |
| <i>Csrp3</i>         | Cysteine and glycine-rich protein 3 (cardiac LIM protein) | BA002 | 005_007_E03                  | 0.042   | 1.825               |
| <b><i>Prrx1</i></b>  | Paired related homeobox 1                                 | BA002 | 007_014_A16                  | 0.000   | 1.488               |
| <b><i>Znf681</i></b> | Zinc finger protein 681                                   | BA01  | 5222004_000_011D_E02_10      | 0.005   | 1.441               |
| <i>Ahnak</i>         | AHNAK nucleoprotein                                       | BA002 | 005_010_K08                  | 0.019   | 1.437               |
| <i>Loc727893</i>     | Phosphodiesterase 4D interacting protein                  | BA002 | 005_011_B22                  | 0.024   | 1.421               |
| <i>Nnat</i>          | Neuronatin                                                | BA002 | 007_022_P12                  | 0.043   | 1.384               |
| <i>C10orf116</i>     | Chromosome 10 open reading frame 116                      | BA002 | 005-023C_H11_2006-11-16      | 0.018   | 1.380               |
| <i>Fat</i>           | FAT tumor suppressor homolog 1                            | BA002 | 007_021_J10                  | 0.035   | 1.356               |
| <b><i>Lmo7</i></b>   | LIM domain 7                                              | BA002 | 005-018A_C12_2006-10-13      | 0.002   | 1.317               |
| <i>Ptgis</i>         | Prostaglandin I2 (prostacyclin) synthase                  | BA002 | 008_006_N12                  | 0.020   | 1.261               |
| <b><i>Nfib</i></b>   | Nuclear factor I/B                                        | BA002 | 005_010_A05                  | 0.000   | 1.245               |
| <i>Epb4112</i>       | Erythrocyte membrane protein band 4.1-like 2              | BA01  | 02102004A_000_008A_B7_B07_03 | 0.022   | 1.193               |

|                        |                                                                     |       |                          |       |       |
|------------------------|---------------------------------------------------------------------|-------|--------------------------|-------|-------|
| <i>Fn1</i>             | Fibronectin 1                                                       | BA002 | 008_005_I14              | 0.027 | 1.192 |
| <i>Sgcb</i>            | Sarcoglycan, beta (43kda dystrophin-associated glycoprotein)        | BA002 | 005-023D_D06_2006-11-16  | 0.012 | 1.188 |
| <b><i>Gtdc1</i></b>    | Glycosyltransferase-like domain containing 1                        | BA002 | 008-001C_B03_2006-11-07  | 0.006 | 1.180 |
| <i>Plekha5</i>         | Pleckstrin homology domain containing, family A member 5            | BA002 | 007_005_A10              | 0.015 | 1.177 |
| <i>Cabc1</i>           | Aarf domain containing kinase 3 (chaperone-ABC1-like)               | BA002 | 005-014C_E05_2006-10-05  | 0.049 | 1.173 |
| <i>Map1b</i>           | Microtubule-associated protein 1B                                   | BA002 | 007_010_G14              | 0.035 | 1.165 |
| <i>Tm4sf1</i>          | Transmembrane 4 L six family member 1                               | BA002 | 005_005_I12              | 0.014 | 1.153 |
| <i>Timp2</i>           | TIMP metalloproteinase inhibitor 2                                  | BA002 | 005_004_P03              | 0.021 | 1.138 |
| <b><i>Hif1an</i></b>   | Hypoxia inducible factor 1, alpha subunit inhibitor                 | BA002 | 005-021C_D02_2006-12-05  | 0.003 | 1.136 |
| <b><i>Sumo3</i></b>    | SMT3 suppressor of mif two 3 homolog 3                              | BA002 | 008_006_I02              | 0.001 | 1.121 |
| <i>Cmya5</i>           | Cardiomyopathy associated 5                                         | BA01  | 004_006A_F08             | 0.025 | 1.108 |
| <i>Txnip</i>           | Thioredoxin interacting protein                                     | BA002 | 011-015_N19              | 0.011 | 1.108 |
| <i>Olfml3</i>          | Olfactomedin-like 3                                                 | BA002 | 008_007_M22              | 0.024 | 1.094 |
| <b><i>Znf532</i></b>   | Zinc finger protein 532                                             | BA002 | 007_025_D18              | 0.002 | 1.084 |
| <i>Kiaa1217</i>        | Kiaa1217                                                            | BA002 | 008_023_F10              | 0.029 | 1.083 |
| <i>Maged1</i>          | Melanoma antigen family D, 1                                        | BA002 | 005-015B_D08_2006-10-21  | 0.017 | 1.079 |
| <i>Ecm2</i>            | Extracellular matrix protein 2, female organ and adipocyte specific | BA002 | 005_010_I20              | 0.015 | 1.069 |
| <b><i>Bhlhb2</i></b>   | Basic helix-loop-helix family, member e40                           | BA002 | 008B-001D_G10_2006-11-08 | 0.000 | 1.067 |
| <b><i>C12orf50</i></b> | Chromosome 12 open reading frame 50                                 | BA01  | 04192004_000_006C_G12_14 | 0.006 | 1.057 |
| <i>Mef2c</i>           | Myocyte enhancer factor 2C                                          | BA002 | 007_026_C14              | 0.013 | 1.055 |
| <i>Cav1</i>            | Caveolin 1, caveolae protein                                        | BA002 | 007_011_E01              | 0.023 | 1.055 |
| <b><i>Raph1</i></b>    | Ras association (ralgds/AF-6) and pleckstrin homology domains 1     | BA002 | 008_008_C09              | 0.004 | 1.043 |
| <i>Timp3</i>           | TIMP metalloproteinase inhibitor 3                                  | BA01  | S401692.UAF-991-M13F     | 0.010 | 1.038 |
| <b><i>Ttc3</i></b>     | Tetratricopeptide repeat domain 3                                   | BA01  | 001_002B_F01             | 0.008 | 1.034 |
| <b><i>Pls3</i></b>     | Plastin 3                                                           | BA002 | 007_013_O03              | 0.005 | 1.033 |
| <b><i>Tead1</i></b>    | TEA domain family member 1 (SV40 transcriptional enhancer factor)   | BA002 | 008_006_C10              | 0.007 | 1.022 |
| <i>Rnf126</i>          | Ring finger protein 126                                             | BA01  | 004_002C_H06             | 0.048 | 1.007 |

|                 |                                                                        |       |                           |       |       |
|-----------------|------------------------------------------------------------------------|-------|---------------------------|-------|-------|
| <b>Caprin2</b>  | Caprin family member 2                                                 | BA01  | 04202004A_000_009A_D04_08 | 0.010 | 0.983 |
| <b>Anxa3</b>    | Annexin A3                                                             | BA002 | 008_002_B17               | 0.005 | 0.980 |
| <b>C10orf56</b> | Zinc finger, CCHC domain containing 24                                 | BA002 | 008_012_F18               | 0.015 | 0.965 |
| <b>Ntrk2</b>    | Neurotrophic tyrosine kinase, receptor, type 2                         | BA002 | 007_004_O21               | 0.020 | 0.961 |
| <b>Thbs4</b>    | Thrombospondin 4                                                       | BA002 | 010-003B_A08_2007-03-28   | 0.011 | 0.959 |
| <b>Il33</b>     | Interleukin 33                                                         | BA002 | 008_028_D10               | 0.016 | 0.959 |
| <b>Tenc1</b>    | Tensin like C1 domain containing phosphatase (tensin 2)                | BA002 | 005-015A_E04_2006-10-25   | 0.005 | 0.957 |
| <b>Znf383</b>   | Zinc finger protein 383                                                | BA002 | 007_002_O02               | 0.002 | 0.955 |
| <b>Ppp1r3b</b>  | Protein phosphatase 1, regulatory (inhibitor) subunit 3B               | BA002 | 008_005_L18               | 0.040 | 0.952 |
| <b>Nuak1</b>    | NUAK family, SNF1-like kinase, 1                                       | BA002 | 008_004_K18               | 0.026 | 0.952 |
| <b>Kif21a</b>   | Kinesin family member 21A                                              | BA002 | 007_024_J07               | 0.000 | 0.949 |
| <b>Tceal2</b>   | Transcription elongation factor A (SII)-like 2                         | BA002 | 007-019C_B05_2006-10-17   | 0.010 | 0.938 |
| <b>Dcn</b>      | Decorin                                                                | BA01  | 004_004A_C03              | 0.002 | 0.936 |
| <b>Mbnl2</b>    | Muscleblind-like 2                                                     | BA002 | 007_010_O08               | 0.029 | 0.932 |
| <b>Tnni3</b>    | Troponin I type 3                                                      | BA002 | 005-019C_B06_2006-12-01   | 0.016 | 0.910 |
| <b>Thbs1</b>    | Thrombospondin 1                                                       | BA002 | 008_021_M01               | 0.028 | 0.905 |
| <b>Rbp4</b>     | Retinol binding protein 4, plasma                                      | BA002 | 008_016_J20               | 0.022 | 0.898 |
| <b>Bhlhb9</b>   | Basic helix-loop-helix domain containing, class B, 9                   | BA002 | 005-017B_A04_2006-11-06   | 0.000 | 0.897 |
| <b>Akap11</b>   | A kinase (PRKA) anchor protein 11                                      | BA002 | 007_006_P11               | 0.037 | 0.894 |
| <b>Rtn2</b>     | Reticulon 2                                                            | BA002 | 007_013_N22               | 0.017 | 0.893 |
| <b>R3hdm2</b>   | R3H domain containing 2                                                | BA002 | 005-016D_H11_2006-11-10   | 0.002 | 0.892 |
| <b>Sdc2</b>     | Syndecan 2                                                             | BA002 | 007_026_A24               | 0.013 | 0.889 |
| <b>Kalrn</b>    | Kalirin, rhogef kinase                                                 | BA002 | 007_031_N14               | 0.023 | 0.884 |
| <b>Tmeff1</b>   | Transmembrane protein with EGF-like and two follistatin-like domains 1 | BA002 | 007_021_F15               | 0.006 | 0.880 |
| <b>Cmb1</b>     | Carboxymethylenebutenolidase homolog                                   | BA01  | 001_001C_G09              | 0.032 | 0.877 |
| <b>Zfp36l1</b>  | Zinc finger protein 36, C3H type-like 1                                | BA01  | UAhib_3612.y1_010         | 0.020 | 0.871 |
| <b>C5orf13</b>  | Chromosome 5 open reading frame 13                                     | BA002 | 008_024_C14               | 0.029 | 0.863 |
| <b>Aldh1a3</b>  | Aldehyde dehydrogenase 1 family, member A3                             | BA002 | 008_008_A10               | 0.005 | 0.861 |
| <b>Auts2</b>    | Autism susceptibility candidate 2                                      | BA002 | 008_008_C19               | 0.030 | 0.851 |
| <b>Dstn</b>     | Destrin (actin depolymerizing factor)                                  | BA002 | 007_022_H03               | 0.039 | 0.848 |
| <b>Ehbp1</b>    | EH domain binding protein 1                                            | BA002 | 005_004_H20               | 0.036 | 0.847 |

|                 |                                                                          |       |                             |       |       |
|-----------------|--------------------------------------------------------------------------|-------|-----------------------------|-------|-------|
| <b>Pfn2</b>     | Profilin 2                                                               | BA002 | 005_010_D03                 | 0.000 | 0.841 |
| <b>Zeb1</b>     | Zinc finger E-box binding homeobox 1                                     | BA002 | 007_008_A08                 | 0.000 | 0.841 |
| <b>Mapk8</b>    | Mitogen-activated protein kinase 8                                       | BA002 | 007_008_P23                 | 0.006 | 0.837 |
| <b>Rbm3</b>     | RNA binding motif (RNP1, RRM) protein 3                                  | BA01  | TC146                       | 0.021 | 0.833 |
| <b>Prosp</b>    | Protein S pseudogene (beta)                                              | BA002 | 008_020_G15                 | 0.011 | 0.831 |
| <b>Hoxa10</b>   | Homeobox A10                                                             | BA002 | 011-007_O17                 | 0.008 | 0.831 |
| <b>Tef</b>      | Thyrotrophic embryonic factor                                            | BA002 | 007_011_L01                 | 0.032 | 0.828 |
| <b>Kif13a</b>   | Kinesin family member 13A                                                | BA002 | 007_030_E07                 | 0.020 | 0.823 |
| <b>Taf7</b>     | TAF7 RNA polymerase II, TATA box binding protein (TBP)-associated factor | BA002 | 007-019D_F04_2006-11-01     | 0.010 | 0.820 |
| <b>Nudt7</b>    | Nudix (nucleoside diphosphate linked moiety X)-type motif 7              | BA002 | 008_016_I08                 | 0.002 | 0.815 |
| <b>Uba1</b>     | Ubiquitin-like modifier activating enzyme 1                              | BA01  | 12162003a_000_004_B6_B06_04 | 0.006 | 0.812 |
| <b>Kctd18</b>   | Potassium channel tetramerisation domain containing 18                   | BA002 | 008_016_M10                 | 0.002 | 0.809 |
| <b>Arid1b</b>   | AT rich interactive domain 1B (SWI1-like)                                | BA002 | 008_023_O18                 | 0.029 | 0.804 |
| <b>Dock9</b>    | Dedicator of cytokinesis 9                                               | BA01  | 04192004_000_006C_F03_11    | 0.007 | 0.796 |
| <b>Bbs2</b>     | Bardet-Biedl syndrome 2                                                  | BA002 | 007_020_L07                 | 0.001 | 0.796 |
| <b>Pcbp2</b>    | Poly(rc) binding protein 2                                               | BA01  | UAhib_1460.y1_058           | 0.003 | 0.796 |
| <b>Malat1</b>   | Metastasis associated lung adenocarcinoma transcript 1                   | BA002 | 011-011_F10                 | 0.018 | 0.795 |
| <b>Msrb3</b>    | Methionine sulfoxide reductase B3                                        | BA002 | 005_011_N19                 | 0.016 | 0.785 |
| <b>Prepl</b>    | Prolyl endopeptidase-like                                                | BA002 | 007_031_B19                 | 0.003 | 0.783 |
| <b>Phldb2</b>   | Pleckstrin homology-like domain, family B, member 2                      | BA01  | UAhib_1549.y1_063           | 0.007 | 0.781 |
| <b>Zfyve21</b>  | Zinc finger, FYVE domain containing 21                                   | BA002 | 007_007_K20                 | 0.017 | 0.781 |
| <b>Tspan7</b>   | Tetraspanin 7                                                            | BA01  | TC101                       | 0.037 | 0.778 |
| <b>Casd1</b>    | CAS1 domain containing 1                                                 | BA002 | 007_003_K22                 | 0.018 | 0.774 |
| <b>Lifr</b>     | Leukemia inhibitory factor receptor alpha                                | BA002 | 005-016B_G08_2006-11-22     | 0.047 | 0.771 |
| <b>Schip1</b>   | Schwannomin interacting protein 1                                        | BA01  | 004_004B_G05                | 0.025 | 0.769 |
| <b>Wwp1</b>     | WW domain containing E3 ubiquitin protein ligase 1                       | BA002 | 008_005_P09                 | 0.008 | 0.769 |
| <b>C17orf58</b> | Chromosome 17 open reading frame 58                                      | BA002 | 007_005_F20                 | 0.048 | 0.768 |
| <b>Ppfibp1</b>  | PTPRF interacting protein, binding protein 1 (liprin beta 1)             | BA002 | 007_020_E16                 | 0.018 | 0.765 |

|                        |                                                                      |       |                           |       |       |
|------------------------|----------------------------------------------------------------------|-------|---------------------------|-------|-------|
| <i>Fam13c1</i>         | Family with sequence similarity 13, member C                         | BA002 | 008_004_P15               | 0.034 | 0.765 |
| <i>Bhmt2</i>           | Betaine--homocysteine S-methyltransferase 2                          | BA002 | 008_014_L22               | 0.039 | 0.763 |
| <b><i>Glo1</i></b>     | Glyoxalase I                                                         | BA002 | 007_012_E21               | 0.005 | 0.760 |
| <i>S100a10</i>         | S100 calcium binding protein A10                                     | BA002 | 005-012C_E03_2006-11-28   | 0.014 | 0.756 |
| <b><i>Ptprb</i></b>    | Protein tyrosine phosphatase, receptor type, B                       | BA002 | 007_009_F22               | 0.002 | 0.755 |
| <b><i>Sfpq</i></b>     | Splicing factor proline/glutamine-rich                               | BA002 | 008_006_F17               | 0.007 | 0.754 |
| <b><i>Fap</i></b>      | Fibroblast activation protein, alpha                                 | BA002 | 005_008_A09               | 0.002 | 0.751 |
| <i>Mysm1</i>           | Myb-like, SWIRM and MPN domains 1                                    | BA01  | 04122004_000-006A_E11_09  | 0.035 | 0.746 |
| <i>Klf10</i>           | Kruppel-like factor 10                                               | BA002 | 008_023_G04               | 0.042 | 0.746 |
| <b><i>C6orf145</i></b> | Chromosome 6 open reading frame 145                                  | BA002 | 008_014_M09               | 0.001 | 0.743 |
| <i>Cald1</i>           | Caldesmon 1                                                          | BA01  | UAhib_3471.y1_067         | 0.041 | 0.741 |
| <i>Fam54b</i>          | Family with sequence similarity 54, member B                         | BA002 | 005-023D_E10_2006-11-16   | 0.015 | 0.734 |
| <i>Clk1</i>            | CDC-like kinase 1                                                    | BA002 | 005-023B_C03_2006-11-11   | 0.027 | 0.732 |
| <b><i>Csde1</i></b>    | Cold shock domain containing E1, RNA-binding                         | BA002 | 008B-001C_G03_2006-11-09  | 0.010 | 0.728 |
| <b><i>Tceal4</i></b>   | Transcription elongation factor A (SII)-like 4                       | BA002 | 013-006_J12               | 0.002 | 0.727 |
| <i>Svil</i>            | Supervillin                                                          | BA002 | 011-005_L17               | 0.025 | 0.727 |
| <i>Atp2b1</i>          | ATPase, Ca <sup>++</sup> transporting, plasma membrane 1             | BA002 | 008_002_G24               | 0.027 | 0.724 |
| <i>Spink2</i>          | Serine peptidase inhibitor, Kazal type 2 (acrosin-trypsin inhibitor) | BA002 | 007_008_A16               | 0.047 | 0.718 |
| <i>Sptbn1</i>          | Spectrin, beta, non-erythrocytic 1                                   | BA01  | 04202004A_000_009A_C06_06 | 0.017 | 0.716 |
| <b><i>Rragb</i></b>    | Ras-related GTP binding B                                            | BA01  | 05202004A_000_011B_B01_03 | 0.002 | 0.714 |
| <b><i>Tle1</i></b>     | Transducin-like enhancer of split 1                                  | BA002 | 005-023D_G09_2006-11-16   | 0.000 | 0.711 |
| <b><i>Jam2</i></b>     | Junctional adhesion molecule 2                                       | BA002 | 011-013_A10               | 0.002 | 0.709 |
| <b><i>Tcea3</i></b>    | Transcription elongation factor A (SII), 3                           | BA002 | 011-015_D09               | 0.001 | 0.708 |
| <b><i>Ttn</i></b>      | Titin                                                                | BA01  | 004_001D_G09              | 0.004 | 0.702 |
| <b><i>Zmym5</i></b>    | Zinc finger, MYM-type 5                                              | BA01  | 05202004_001_011A_F03_11  | 0.005 | 0.700 |
| <b><i>Fbxo25</i></b>   | F-box protein 25                                                     | BA002 | 007_029_F11               | 0.010 | 0.700 |
| <i>Tbc1d12</i>         | TBC1 domain family, member 12                                        | BA002 | 007_003_F19               | 0.036 | 0.699 |
| <i>Armcx3</i>          | Armadillo repeat containing, X-linked 3                              | BA002 | 007_008_L17               | 0.020 | 0.696 |
| <i>Pftk1</i>           | Cyclin-dependent kinase 14                                           | BA002 | 014-007_A04               | 0.034 | 0.696 |
| <b><i>Frap1</i></b>    | Mechanistic target of rapamycin                                      | BA002 | 005-021D_B11_2006-12-05   | 0.000 | 0.695 |

|                      |                                                                                                   |       |                           |       |       |
|----------------------|---------------------------------------------------------------------------------------------------|-------|---------------------------|-------|-------|
|                      | (serine/threonine kinase)                                                                         |       |                           |       |       |
| <i>Clu</i>           | Clusterin                                                                                         | BA01  | TC231                     | 0.014 | 0.693 |
| <i>Tacc2</i>         | Transforming, acidic coiled-coil containing protein 2                                             | BA01  | TC568                     | 0.034 | 0.682 |
| <i>Gnai1</i>         | Guanine nucleotide binding protein (G protein), alpha inhibiting activity polypeptide 1           | BA002 | 005_006_E16               | 0.013 | 0.679 |
| <i>Kcmf1</i>         | Potassium channel modulatory factor 1                                                             | BA01  | TC322                     | 0.012 | 0.677 |
| <i>Fhod3</i>         | Formin homology 2 domain containing 3                                                             | BA002 | 007_033_H06               | 0.014 | 0.675 |
| <b><i>Itm2a</i></b>  | Integral membrane protein 2A                                                                      | BA002 | 007_008_B20               | 0.009 | 0.667 |
| <i>Anxa1</i>         | Annexin A1                                                                                        | BA01  | TC370                     | 0.022 | 0.664 |
| <i>Col15a1</i>       | Collagen, type XV, alpha 1                                                                        | BA002 | 005-013A_G02_2006-10-06   | 0.044 | 0.661 |
| <i>Fdft1</i>         | Farnesyl-diphosphate farnesyltransferase 1                                                        | BA01  | 004_001C_F11              | 0.021 | 0.660 |
| <b><i>Tspan3</i></b> | Tetraspanin 3                                                                                     | BA01  | 001_001D_C04              | 0.002 | 0.660 |
| <b><i>Htra1</i></b>  | Htra serine peptidase 1                                                                           | BA002 | 008_032_O15               | 0.006 | 0.658 |
| <i>Rtn4</i>          | Reticulon 4                                                                                       | BA002 | 007_003_G04               | 0.030 | 0.657 |
| <i>C5orf35</i>       | Chromosome 5 open reading frame 35                                                                | BA002 | 005-013B_A07_2006-10-27   | 0.017 | 0.657 |
| <i>Atpaf1</i>        | ATP synthase mitochondrial F1 complex assembly factor 1                                           | BA01  | 05202004A_000_011B_B05_03 | 0.026 | 0.656 |
| <i>Camk2d</i>        | Calcium/calmodulin-dependent protein kinase II delta                                              | BA002 | 007_012_J13               | 0.031 | 0.655 |
| <i>Obfc1</i>         | Oligonucleotide/oligosaccharide-binding fold containing 1                                         | BA002 | 007-019A_H05_2006-10-18   | 0.016 | 0.652 |
| <i>Ccdc76</i>        | Coiled-coil domain containing 76                                                                  | BA01  | UAhib_0383.y1_091         | 0.016 | 0.651 |
| <i>Aga</i>           | Aspartylglucosaminidase                                                                           | BA002 | 007_011_M02               | 0.040 | 0.650 |
| <i>Znf510</i>        | Zinc finger protein 510                                                                           | BA002 | 005-024A_B09_2006-11-15   | 0.049 | 0.650 |
| <i>Smarca1</i>       | SWI/SNF related, matrix associated, actin dependent regulator of chromatin, subfamily a, member 1 | BA002 | 007_031_E24               | 0.018 | 0.647 |
| <i>B3galnt1</i>      | Beta-1,3-N-acetylgalactosaminyltransferase 1 (globoside blood group)                              | BA002 | 008_026_E05               | 0.014 | 0.646 |
| <b><i>Cdh5</i></b>   | Cadherin 5, type 2 (vascular endothelium)                                                         | BA002 | 008_027_D17               | 0.009 | 0.639 |
| <i>Myo1b</i>         | Myosin IB                                                                                         | BA002 | 006-001A_E03_2006-10-10   | 0.044 | 0.632 |
| <i>Lnpep</i>         | Leucyl/cystinyl aminopeptidase                                                                    | BA002 | 007_024_F08               | 0.041 | 0.631 |
| <i>Flj32549</i>      | Flj32549                                                                                          | BA01  | 04122004a_000-006D_C05_05 | 0.040 | 0.628 |
| <i>Ndr3</i>          | NDRG family member 3                                                                              | BA01  | TC424                     | 0.027 | 0.626 |
| <b><i>Sphar</i></b>  | S-phase response (cyclin related)                                                                 | BA002 | 007_006_O12               | 0.000 | 0.623 |
| <b><i>Tmub2</i></b>  | Transmembrane and ubiquitin-like domain containing 2                                              | BA002 | 007_009_L03               | 0.004 | 0.622 |

|                  |                                                                           |       |                          |       |       |
|------------------|---------------------------------------------------------------------------|-------|--------------------------|-------|-------|
| <b>Gtf3a</b>     | General transcription factor IIIA                                         | BA002 | 008_002_F03              | 0.006 | 0.620 |
| <i>Dhrs3</i>     | Dehydrogenase/reductase (SDR family) member 3                             | BA002 | 008_023_I12              | 0.041 | 0.618 |
| <i>Ankrd13d</i>  | Ankyrin repeat domain 13 family, member D                                 | BA002 | 007_030_J08              | 0.021 | 0.614 |
| <i>Cpsf4</i>     | Cleavage and polyadenylation specific factor 4                            | BA002 | 007_030_H22              | 0.025 | 0.611 |
| <i>Brd9</i>      | Bromodomain containing 9                                                  | BA002 | 007_001_J20              | 0.049 | 0.609 |
| <i>Pogk</i>      | Pogo transposable element with KRAB domain                                | BA002 | 008-001D_H06_2006-11-07  | 0.011 | 0.608 |
| <i>Igf1</i>      | Insulin-like growth factor 1 (somatomedin C)                              | BA01  | TC606                    | 0.042 | 0.608 |
| <i>Fgf13</i>     | Fibroblast growth factor 13                                               | BA01  | 003_002A_G08             | 0.036 | 0.607 |
| <b>Mgst2</b>     | Microsomal glutathione S-transferase 2                                    | BA002 | 005-015C_D03_2006-10-20  | 0.004 | 0.603 |
| <i>Qki</i>       | Quaking homolog, KH domain RNA binding                                    | BA002 | 008_027_C15              | 0.048 | 0.603 |
| <b>Ggcx</b>      | Gamma-glutamyl carboxylase                                                | BA002 | 008_027_K13              | 0.007 | 0.602 |
| <i>Gng11</i>     | Guanine nucleotide binding protein (G protein), gamma 11                  | BA002 | 005_011_P09              | 0.034 | 0.602 |
| <b>Echdc2</b>    | Enoyl coa hydratase domain containing 2                                   | BA002 | 008B-001B_G05_2006-10-28 | 0.001 | 0.601 |
| <i>Blcap</i>     | Bladder cancer associated protein                                         | BA01  | 003_001C_G07             | 0.020 | 0.599 |
| <i>Yap1</i>      | Yes-associated protein 1                                                  | BA002 | 005-012A_E02_2006-11-15  | 0.011 | 0.598 |
| <i>H3f3b</i>     | H3 histone, family 3B (H3.3B)                                             | BA002 | 005-022C_A07_2006-11-22  | 0.018 | 0.598 |
| <i>Synpr</i>     | Synaptoporin                                                              | BA01  | 05202004_001_011A_D09_07 | 0.037 | 0.593 |
| <i>Rxra</i>      | Retinoid X receptor, alpha                                                | BA002 | 008_023_N15              | 0.015 | 0.589 |
| <i>Fjl40235</i>  | Chromosome 19 open reading frame 75                                       | BA002 | 008_002_L07              | 0.011 | 0.588 |
| <i>Nfic</i>      | Nuclear factor I/C (CCAAT-binding transcription factor)                   | BA002 | 007_013_J18              | 0.030 | 0.588 |
| <b>Trim45</b>    | Tripartite motif-containing 45                                            | BA002 | 010-001B_H02_2007-04-02  | 0.008 | 0.587 |
| <i>Bcl6</i>      | B-cell CLL/lymphoma 6                                                     | BA002 | 005_010_H04              | 0.021 | 0.587 |
| <b>Cwf19l2</b>   | CWF19-like 2, cell cycle control                                          | BA002 | 007_012_P12              | 0.010 | 0.587 |
| <b>Vtn</b>       | Vitronectin                                                               | BA002 | 008-001B_G03_2006-10-27  | 0.006 | 0.586 |
| <i>Pdgfc</i>     | Platelet derived growth factor C                                          | BA002 | 007_013_E23              | 0.041 | 0.586 |
| <i>Cmpk1</i>     | Cytidine monophosphate (UMP-CMP) kinase 1, cytosolic                      | BA01  | UAhib_1011.y1_012        | 0.038 | 0.583 |
| <i>Slc25a20</i>  | Solute carrier family 25 (carnitine/acylcarnitine translocase), member 20 | BA002 | 005-021B_G02_2006-12-06  | 0.013 | 0.581 |
| <b>Loc647307</b> | Phosphatidylethanolamine binding protein 1                                | BA002 | 006-001A_F03_2006-10-10  | 0.004 | 0.580 |
| <i>Rabep1</i>    | Rabaptin, RAB gtpase binding effector protein 1                           | BA002 | 007_031_F22              | 0.039 | 0.573 |
| <i>Dnal1</i>     | Dynein, axonemal, light chain 1                                           | BA002 | 007_009_A18              | 0.019 | 0.571 |



|                  |                                                                           |       |                             |       |       |
|------------------|---------------------------------------------------------------------------|-------|-----------------------------|-------|-------|
| <i>Zak</i>       | Sterile alpha motif and leucine zipper containing kinase AZK              | BA002 | 014-001A_G02_2007-06-11     | 0.011 | 0.571 |
| <i>Ccnt2</i>     | Cyclin T2                                                                 | BA002 | 005-020A_D10_2006-11-10     | 0.033 | 0.569 |
| <b>Sox9</b>      | SRY (sex determining region Y)-box 9                                      | BA01  | TC535                       | 0.010 | 0.568 |
| <b>C2orf16</b>   | Chromosome 2 open reading frame 16                                        | BA002 | 008_022_C22                 | 0.001 | 0.565 |
| <i>Als2cr4</i>   | Amyotrophic lateral sclerosis 2 (juvenile) chromosome region, candidate 4 | BA002 | 008_005_O12                 | 0.047 | 0.565 |
| <i>Prpf39</i>    | PRP39 pre-mrna processing factor 39 homolog                               | BA002 | 008_025_E16                 | 0.022 | 0.564 |
| <b>Nhp2l1</b>    | NHP2 non-histone chromosome protein 2-like 1                              | BA01  | 004_002D_F10                | 0.005 | 0.564 |
| <i>Socs6</i>     | Suppressor of cytokine signaling 6                                        | BA002 | 008_021_N16                 | 0.017 | 0.562 |
| <i>Homer1</i>    | Homer homolog 1                                                           | BA002 | 008_007_F24                 | 0.040 | 0.560 |
| <i>C14orf143</i> | Chromosome 14 open reading frame 143                                      | BA002 | 007_010_D08                 | 0.034 | 0.555 |
| <i>Ptprd</i>     | Protein tyrosine phosphatase, receptor type, D                            | BA01  | 12162003a_000_004_D6_D06_08 | 0.039 | 0.553 |
| <i>Ssfa2</i>     | Sperm specific antigen 2                                                  | BA01  | 05142004_000_010B_G11_13    | 0.035 | 0.552 |
| <i>Myst2</i>     | MYST histone acetyltransferase 2                                          | BA01  | 004_005C_E02                | 0.018 | 0.549 |
| <i>C8orf59</i>   | Chromosome 8 open reading frame 59                                        | BA002 | 008B-001B_A05_2006-10-28    | 0.035 | 0.545 |
| <i>Bex2</i>      | Brain expressed X-linked 2                                                | BA002 | 007B-001A_H03_2006-10-18    | 0.011 | 0.543 |
| <i>Nfu1</i>      | NFU1 iron-sulfur cluster scaffold homolog                                 | BA002 | 005-022C_G05_2006-11-22     | 0.011 | 0.541 |
| <i>Gltpd1</i>    | Glycolipid transfer protein domain containing 1                           | BA002 | 008_006_C09                 | 0.015 | 0.539 |
| <i>Calcoco2</i>  | Calcium binding and coiled-coil domain 2                                  | BA002 | 008_030_J20                 | 0.036 | 0.536 |
| <i>Asphd1</i>    | Aspartate beta-hydroxylase domain containing 1                            | BA002 | 007_002_D14                 | 0.017 | 0.534 |
| <i>Kiaa1737</i>  | Kiaa1737                                                                  | BA002 | 007_012_A11                 | 0.018 | 0.529 |
| <i>Prg-3</i>     | Proteoglycan 3                                                            | BA002 | 014-004_G07                 | 0.022 | 0.529 |
| <i>Znf331</i>    | Zinc finger protein 331                                                   | BA002 | 008-001A_C08_2006-11-02     | 0.038 | 0.528 |
| <i>Pon1</i>      | Paraoxonase 1                                                             | BA002 | 006-001A_B04_2006-10-10     | 0.046 | 0.526 |
| <i>C14orf179</i> | Chromosome 14 open reading frame 179                                      | BA002 | 005-012C_G03_2006-11-28     | 0.040 | 0.525 |
| <i>Loc93622</i>  | Hypothetical LOC93622                                                     | BA002 | 007_028_F19                 | 0.024 | 0.524 |
| <i>Fbxw11</i>    | F-box and WD repeat domain containing 11                                  | BA002 | 007_028_J14                 | 0.025 | 0.523 |
| <i>Chl1</i>      | Cell adhesion molecule with homology to L1CAM (close homolog of L1)       | BA002 | 007_003_M03                 | 0.033 | 0.522 |

|                      |                                                                                                         |       |                            |       |        |
|----------------------|---------------------------------------------------------------------------------------------------------|-------|----------------------------|-------|--------|
| <i>Mllt11</i>        | Myeloid/lymphoid or mixed-lineage leukemia (trithorax homolog, <i>Drosophila</i> ); translocated to, 11 | BA01  | 12162003_000_003_D3_D03_07 | 0.049 | 0.519  |
| <i>Pard3</i>         | Par-3 partitioning defective 3 homolog                                                                  | BA002 | 007_020_M15                | 0.020 | 0.519  |
| <i>Ctsf</i>          | Cathepsin F                                                                                             | BA002 | 007_009_A07                | 0.032 | 0.516  |
| <b><i>Igf1r</i></b>  | Insulin-like growth factor 1 receptor                                                                   | BA01  | 004_003A_H12               | 0.005 | 0.515  |
| <i>Jmjd4</i>         | Jumonji domain containing 4                                                                             | BA002 | 007_008_P04                | 0.027 | 0.515  |
| <i>Ankmy2</i>        | Ankyrin repeat and MYND domain containing 2                                                             | BA002 | 008-001C_B09_2006-11-08    | 0.025 | 0.515  |
| <i>Pnpla8</i>        | Patatin-like phospholipase domain containing 8                                                          | BA01  | 04022004A_000_007D_G10_14  | 0.014 | 0.512  |
| <i>Prox1</i>         | Prospero homeobox 1                                                                                     | BA002 | 008_027_O17                | 0.020 | 0.512  |
| <i>Zdhhc9</i>        | Zinc finger, DHHC-type containing 9                                                                     | BA01  | 004_006B_C11               | 0.025 | 0.512  |
| <i>Prtfdc1</i>       | Phosphoribosyl transferase domain containing 1                                                          | BA01  | 003_003B_F06               | 0.012 | 0.506  |
| <i>Myo6</i>          | Myosin VI                                                                                               | BA002 | 005-018D_A01_2006-10-25    | 0.012 | 0.503  |
| <b><i>Sub1</i></b>   | SUB1 homolog                                                                                            | BA01  | 35_C05                     | 0.002 | -0.500 |
| <i>Krr1</i>          | KRR1, small subunit (SSU) processome component, homolog                                                 | BA002 | 007_025_F06                | 0.016 | -0.500 |
| <i>Sft2d1</i>        | SFT2 domain containing 1                                                                                | BA002 | 008_020_J12                | 0.037 | -0.502 |
| <i>Ubx2</i>          | UBX domain protein 4                                                                                    | BA002 | 005-016B_C02_2006-11-22    | 0.018 | -0.502 |
| <i>Commd6</i>        | COMM domain containing 6                                                                                | BA002 | 014-001D_E01_2007-06-15    | 0.030 | -0.503 |
| <b><i>Chchd2</i></b> | Coiled-coil-helix-coiled-coil-helix domain containing 2                                                 | BA01  | TC602                      | 0.004 | -0.504 |
| <i>Fam108b1</i>      | Family with sequence similarity 108, member B1                                                          | BA002 | 007-019C_B11_2006-10-18    | 0.038 | -0.505 |
| <i>Rtcd1</i>         | RNA terminal phosphate cyclase domain 1                                                                 | BA01  | TC337                      | 0.017 | -0.505 |
| <b><i>Rbm8a</i></b>  | RNA binding motif protein 8A                                                                            | BA01  | 05222004_000_011C_A07_01   | 0.003 | -0.507 |
| <i>Ccrk</i>          | Cyclin-dependent kinase 20                                                                              | BA002 | 007_029_N06                | 0.035 | -0.507 |
| <i>Aldh9a1</i>       | Aldehyde dehydrogenase 9 family, member A1                                                              | BA002 | 011-005_K02                | 0.043 | -0.509 |
| <b><i>Appl2</i></b>  | Adaptor protein, phosphotyrosine interaction, PH domain and leucine zipper containing 2                 | BA002 | 005-017A_E12_2006-11-07    | 0.005 | -0.509 |
| <i>C19orf2</i>       | Chromosome 19 open reading frame 2                                                                      | BA002 | 008_008_G13                | 0.010 | -0.510 |
| <i>Supt4h1</i>       | Suppressor of Ty 4 homolog 1                                                                            | BA002 | 005_010_O16                | 0.026 | -0.514 |
| <i>C4orf15</i>       | HAUS augmin-like complex, subunit 3                                                                     | BA01  | 04192004_000_006C_B06_04   | 0.010 | -0.515 |
| <b><i>Mrpl3</i></b>  | Mitochondrial ribosomal protein                                                                         | BA002 | 007_029_H03                | 0.005 | -0.515 |

L3

|                  |                                                        |       |                             |       |        |
|------------------|--------------------------------------------------------|-------|-----------------------------|-------|--------|
| <b>Utp14a</b>    | UTP14, U3 small nucleolar ribonucleoprotein, homolog A | BA002 | 008_018_H05a                | 0.002 | -0.516 |
| <i>Hprt1</i>     | Hypoxanthine phosphoribosyltransferase 1               | BA002 | 005-001C_A06_2006-08-17     | 0.036 | -0.517 |
| <i>Ier5</i>      | Immediate early response 5                             | BA002 | 007_025_I09                 | 0.032 | -0.517 |
| <i>Crym</i>      | Crystallin, mu                                         | BA002 | 007_027_I23                 | 0.013 | -0.517 |
| <i>Tmem126b</i>  | Transmembrane protein 126B                             | BA002 | 005_006_C21                 | 0.029 | -0.518 |
| <i>Psm5</i>      | Proteasome (prosome, macropain) subunit, alpha type, 5 | BA01  | 02192004_000_005A_E3_F02_12 | 0.049 | -0.518 |
| <i>Nipsnap3a</i> | Nipsnap homolog 3A                                     | BA002 | 008_025_B12                 | 0.030 | -0.518 |
| <i>Ssbp1</i>     | Single-stranded DNA binding protein 1                  | BA002 | 005-018A_A06_2006-10-12     | 0.013 | -0.519 |
| <i>Lpgat1</i>    | Lysophosphatidylglycerol acyltransferase 1             | BA002 | 005_005_J04                 | 0.040 | -0.523 |
| <i>Decr1</i>     | 2,4-dienoyl coa reductase 1, mitochondrial             | BA01  | 004_003D_B10                | 0.014 | -0.527 |
| <i>Elof1</i>     | Elongation factor 1 homolog                            | BA002 | 007_007_G03                 | 0.023 | -0.527 |
| <i>Bnip3l</i>    | BCL2/adenovirus E1B 19kda interacting protein 3-like   | BA01  | UAhib_1438.y1_037           | 0.035 | -0.528 |
| <i>Naca</i>      | Nascent polypeptide-associated complex alpha subunit   | BA01  | TC645                       | 0.034 | -0.528 |
| <i>Rab9a</i>     | RAB9A, member RAS oncogene family                      | BA002 | 005-025B_C03_2006-10-14     | 0.015 | -0.529 |
| <i>Mrpl39</i>    | Mitochondrial ribosomal protein L39                    | BA002 | 007_009_M16                 | 0.015 | -0.529 |
| <i>Wdr61</i>     | WD repeat domain 61                                    | BA002 | 007_027_G21                 | 0.039 | -0.531 |
| <i>Eny2</i>      | Enhancer of yellow 2 homolog                           | BA002 | 005_010_L03                 | 0.013 | -0.531 |
| <i>Fbn2</i>      | Fibrillin 2                                            | BA002 | 007_007_O05                 | 0.021 | -0.533 |
| <i>Cip29</i>     | SAP domain containing ribonucleoprotein                | BA002 | 007_026_F11                 | 0.016 | -0.534 |
| <i>Rpn2</i>      | Ribophorin II                                          | BA01  | 05222004_000_011C_G06_14    | 0.012 | -0.535 |
| <i>Fam120a</i>   | Family with sequence similarity 120A                   | BA002 | 005_004_L02                 | 0.022 | -0.537 |
| <i>Ncbp2</i>     | Nuclear cap binding protein subunit 2                  | BA002 | 005-013A_C08_2006-10-06     | 0.031 | -0.537 |
| <i>Itgb1bp1</i>  | Integrin beta 1 binding protein 1                      | BA002 | 007_002_H14                 | 0.012 | -0.545 |
| <i>Ap4m1</i>     | Adaptor-related protein complex 4, mu 1 subunit        | BA002 | 007_003_G21                 | 0.024 | -0.546 |
| <b>Adam10</b>    | ADAM metallopeptidase domain 10                        | BA01  | 004_003B_B04                | 0.001 | -0.547 |
| <i>Gpr22</i>     | G protein-coupled receptor 22                          | BA002 | 007_001_D22                 | 0.031 | -0.548 |
| <b>Mad211</b>    | MAD2 mitotic arrest deficient-like 1                   | BA01  | TC470                       | 0.002 | -0.549 |
| <i>Ccdc72</i>    | Coiled-coil domain containing 72                       | BA002 | 005_001A_F05_F05_2006-05-12 | 0.018 | -0.551 |
| <i>C21orf66</i>  | GC-rich sequence DNA-binding                           | BA002 | 007_002_A19                 | 0.047 | -0.552 |

|                     |                                                                                                     |       |                            |       |        |
|---------------------|-----------------------------------------------------------------------------------------------------|-------|----------------------------|-------|--------|
|                     | factor 1                                                                                            |       |                            |       |        |
| <i>Amd1</i>         | Adenosylmethionine decarboxylase 1                                                                  | BA002 | 007_020_D07                | 0.035 | -0.552 |
| <i>Ints9</i>        | Integrator complex subunit 9                                                                        | BA002 | 011-008_P12                | 0.015 | -0.553 |
| <i>C1orf31</i>      | Chromosome 1 open reading frame 31                                                                  | BA01  | TC674                      | 0.028 | -0.554 |
| <i>Csnk2a1</i>      | Casein kinase 2, alpha 1 polypeptide                                                                | BA002 | 005-023D_F01_2006-11-16    | 0.023 | -0.555 |
| <i>Arf3</i>         | ADP-ribosylation factor 3                                                                           | BA002 | 014-004_C08                | 0.028 | -0.555 |
| <b>Taf9</b>         | TAF9 RNA polymerase II, TATA box binding protein (TBP)-associated factor                            | BA01  | 12162003_000_003_E9_E09_09 | 0.007 | -0.556 |
| <i>C10orf84</i>     | Chromosome 10 open reading frame 84                                                                 | BA002 | 005_011_F15                | 0.029 | -0.557 |
| <i>Prdm2</i>        | PR domain containing 2, with ZNF domain                                                             | BA002 | 005_008_B15                | 0.022 | -0.558 |
| <i>Vrk1</i>         | Vaccinia related kinase 1                                                                           | BA01  | TC500                      | 0.017 | -0.559 |
| <b>Ube2d3</b>       | Ubiquitin-conjugating enzyme E2D 3                                                                  | BA01  | UAhib_1637.y1_039          | 0.000 | -0.559 |
| <b>Psenen</b>       | Presenilin enhancer 2 homolog                                                                       | BA002 | 007_030_L01                | 0.006 | -0.559 |
| <i>Ddx46</i>        | DEAD (Asp-Glu-Ala-Asp) box polypeptide 46                                                           | BA002 | 007-019C_C03_2006-10-17    | 0.017 | -0.561 |
| <i>Mtch2</i>        | Mitochondrial carrier homolog 2                                                                     | BA002 | 007_014_C13                | 0.024 | -0.561 |
| <i>Ap2b1</i>        | Adaptor-related protein complex 2, beta 1 subunit                                                   | BA002 | 007_031_G09                | 0.028 | -0.563 |
| <i>Bcap31</i>       | B-cell receptor-associated protein 31                                                               | BA002 | 007_004_P19                | 0.039 | -0.563 |
| <i>Pten</i>         | Phosphatase and tensin homolog                                                                      | BA002 | 008-001B_F10_2006-10-27    | 0.034 | -0.565 |
| <i>Supt16h</i>      | Suppressor of Ty 16 homolog                                                                         | BA002 | 007_005_I19                | 0.045 | -0.566 |
| <b>Loc100129513</b> | Magnesium transporter 1                                                                             | BA01  | UAhib_0558.y1_062          | 0.006 | -0.566 |
| <b>Prdx3</b>        | Peroxiredoxin 3                                                                                     | BA01  | 01082004_000_001_B6_B06_04 | 0.002 | -0.566 |
| <i>Pold3</i>        | Polymerase (DNA-directed), delta 3, accessory subunit                                               | BA002 | 007_005_I08                | 0.046 | -0.566 |
| <i>Nudcd1</i>       | Nudc domain containing 1                                                                            | BA002 | 007_007_N11                | 0.019 | -0.566 |
| <b>Cct5</b>         | Chaperonin containing TCP1, subunit 5 (epsilon)                                                     | BA01  | 004_003B_D12               | 0.002 | -0.569 |
| <i>Herc1</i>        | Hect (homologous to the E6-AP (UBE3A) carboxyl terminus) domain and RCC1 (CHC1)-like domain (RLD) 1 | BA002 | 008_008_C03                | 0.044 | -0.569 |
| <b>Camk2b</b>       | Calcium/calmodulin-dependent protein kinase II beta                                                 | BA002 | 007_031_P24                | 0.007 | -0.569 |
| <i>Prickle4</i>     | Prickle homolog 4                                                                                   | BA002 | 011-003_B10                | 0.041 | -0.570 |
| <i>Hnrnpa1</i>      | Heterogeneous nuclear ribonucleoprotein A1                                                          | BA002 | 008B-001A_E12_2006-10-31   | 0.040 | -0.570 |
| <b>Myd88</b>        | Myeloid differentiation primary                                                                     | BA002 | 008_013_L23                | 0.009 | -0.571 |

|                      |                                                                                    |       |                             |       |        |
|----------------------|------------------------------------------------------------------------------------|-------|-----------------------------|-------|--------|
|                      | response gene (88)                                                                 |       |                             |       |        |
| <i>Ilf3</i>          | Interleukin enhancer binding factor 3, 90kda                                       | BA002 | 008_019_L13                 | 0.015 | -0.571 |
| <i>Hsp90b1</i>       | Heat shock protein 90kda beta (Grp94), member 1                                    | BA01  | TC258                       | 0.021 | -0.572 |
| <i>Cab39</i>         | Calcium binding protein 39                                                         | BA01  | 04122004a_000-006D_B05_03   | 0.027 | -0.573 |
| <b><i>Ccdc49</i></b> | CWC25 spliceosome-associated protein homolog                                       | BA002 | 005-016C_A01_2006-11-03     | 0.004 | -0.576 |
| <i>Papola</i>        | Poly(A) polymerase alpha                                                           | BA002 | 008_029_K07                 | 0.024 | -0.576 |
| <i>Rars2</i>         | Arginyl-trna synthetase 2, mitochondrial                                           | BA002 | 005_005_F11                 | 0.039 | -0.577 |
| <i>Dnajb4</i>        | Dnaj (Hsp40) homolog, subfamily B, member 4                                        | BA002 | 007_030_K18                 | 0.026 | -0.578 |
| <b><i>Elavl1</i></b> | ELAV (embryonic lethal, abnormal vision, Drosophila)-like 1 (Hu antigen R)         | BA01  | TC414                       | 0.002 | -0.579 |
| <i>Tmem183a</i>      | Transmembrane protein 183A                                                         | BA01  | 05152004_000_010C_E01_09    | 0.015 | -0.581 |
| <b><i>Actr6</i></b>  | ARP6 actin-related protein 6 homolog                                               | BA01  | 01082004A_000_002_B6_B06_04 | 0.004 | -0.582 |
| <b><i>Mrlc2</i></b>  | Myosin, light chain 12B, regulatory                                                | BA002 | 007B-001A_A03_2006-10-18    | 0.002 | -0.583 |
| <i>Atp2c1</i>        | AtPase, Ca <sup>++</sup> transporting, type 2C, member 1                           | BA002 | 008_012_O13                 | 0.031 | -0.583 |
| <i>Pip4k2c</i>       | Phosphatidylinositol-5-phosphate 4-kinase, type II, gamma                          | BA002 | 008_032_E09                 | 0.049 | -0.584 |
| <i>Aig1</i>          | Androgen-induced 1                                                                 | BA002 | 007-019C_F06_2006-10-17     | 0.012 | -0.585 |
| <i>Gde1</i>          | Glycerophosphodiester phosphodiesterase 1                                          | BA002 | 007_020_A08                 | 0.043 | -0.586 |
| <b><i>Atic</i></b>   | 5-aminoimidazole-4-carboxamide ribonucleotide formyltransferase/IMP cyclohydrolase | BA002 | 005-015D_F07_2006-10-26     | 0.005 | -0.586 |
| <i>Ndufb3</i>        | NADH dehydrogenase (ubiquinone) 1 beta subcomplex, 3                               | BA002 | 005_005_K22                 | 0.013 | -0.587 |
| <i>Psm5</i>          | Proteasome (prosome, macropain) 26S subunit, non-atpase, 5                         | BA002 | 007_024_L04                 | 0.030 | -0.587 |
| <i>Bckdk</i>         | Branched chain ketoacid dehydrogenase kinase                                       | BA002 | 007_010_B21                 | 0.016 | -0.588 |
| <i>C5orf32</i>       | Chromosome 5 open reading frame 32                                                 | BA002 | 005-014B_E06_2006-11-03     | 0.031 | -0.590 |
| <i>Lca5</i>          | Leber congenital amaurosis 5                                                       | BA002 | 007_023_E02                 | 0.034 | -0.591 |
| <b><i>Ppil3</i></b>  | Peptidylprolyl isomerase (cyclophilin)-like 3                                      | BA002 | 007_006_H01                 | 0.003 | -0.592 |
| <i>Sfrs6</i>         | Serine/arginine-rich splicing factor 6                                             | BA002 | 007_029_D22                 | 0.018 | -0.595 |

|                 |                                                                                 |       |                           |       |        |
|-----------------|---------------------------------------------------------------------------------|-------|---------------------------|-------|--------|
| <b>Ppp1cb</b>   | Protein phosphatase 1, catalytic subunit, beta isozyme                          | BA01  | TC657                     | 0.002 | -0.597 |
| <i>Sugt1</i>    | SGT1, suppressor of G2 allele of SKP1                                           | BA002 | 008_003_N24               | 0.016 | -0.604 |
| <b>Shfm1</b>    | Split hand/foot malformation (ectrodactyly) type 1                              | BA002 | 005-017A_F03_2006-11-07   | 0.002 | -0.606 |
| <i>Gpsm3</i>    | G-protein signaling modulator 3                                                 | BA002 | 008_010_G12               | 0.014 | -0.606 |
| <b>Nolc1</b>    | Nucleolar and coiled-body phosphoprotein 1                                      | BA002 | 008_014_K06               | 0.003 | -0.607 |
| <i>Vps72</i>    | Vacuolar protein sorting 72 homolog                                             | BA002 | 008_003_H01               | 0.040 | -0.607 |
| <i>Snta1</i>    | Syntrophin, alpha 1 (dystrophin-associated protein A1, 59kda, acidic component) | BA002 | 011-006_G18               | 0.021 | -0.608 |
| <b>Lypla2</b>   | Lysophospholipase II                                                            | BA002 | 007_030_J21               | 0.008 | -0.610 |
| <i>Cnp</i>      | 2',3'-cyclic nucleotide 3' phosphodiesterase                                    | BA002 | 007_033_H08               | 0.013 | -0.612 |
| <i>Ccdc56</i>   | Coiled-coil domain containing 56                                                | BA002 | 008-001A_F10_2006-11-02   | 0.028 | -0.615 |
| <i>Kiaa1429</i> | Kiaa1429                                                                        | BA002 | 007_027_M02               | 0.023 | -0.615 |
| <i>Acadl</i>    | Acyl-coa dehydrogenase, long chain                                              | BA002 | 008_007_C13               | 0.018 | -0.615 |
| <b>C17orf37</b> | Chromosome 17 open reading frame 37                                             | BA002 | 007_001_H16               | 0.003 | -0.615 |
| <b>Snrpd1</b>   | Small nuclear ribonucleoprotein D1 polypeptide                                  | BA01  | UAhib_3679.y1_068         | 0.002 | -0.616 |
| <i>Hsp90aa1</i> | Heat shock protein 90kda alpha (cytosolic), class A member 1                    | BA01  | TC261                     | 0.012 | -0.617 |
| <i>Atp6v1b2</i> | Atpase, H+ transporting, lysosomal 56/58kda, V1 subunit B2                      | BA01  | 04202004A_000_009A_B03_03 | 0.043 | -0.618 |
| <i>Sult1b1</i>  | Sulfotransferase family, cytosolic, 1B, member 1                                | BA002 | 008_011_F21               | 0.020 | -0.620 |
| <i>Acat1</i>    | Acetyl-coa acetyltransferase 1                                                  | BA002 | 007_002_I20               | 0.016 | -0.622 |
| <b>Gnb1</b>     | Guanine nucleotide binding protein (G protein), beta polypeptide 1              | BA002 | 008_031_B10               | 0.006 | -0.623 |
| <i>Atp6v1d</i>  | Atpase, H+ transporting, lysosomal 34kda, V1 subunit D                          | BA002 | 007_003_H12               | 0.036 | -0.624 |
| <i>Camta1</i>   | Calmodulin binding transcription activator 1                                    | BA002 | 008_015_H11               | 0.034 | -0.624 |
| <i>Tmem229a</i> | Transmembrane protein 229A                                                      | BA002 | 007_004_M21               | 0.018 | -0.624 |
| <i>Ap3b1</i>    | Adaptor-related protein complex 3, beta 1 subunit                               | BA01  | 04022004A_000_007D_H05_15 | 0.037 | -0.624 |
| <i>Copz1</i>    | Coatomer protein complex, subunit zeta 1                                        | BA002 | 008_013_A22               | 0.011 | -0.631 |
| <b>Coro1c</b>   | Coronin, actin binding protein, 1C                                              | BA002 | 007_013_B08               | 0.002 | -0.634 |
| <b>Ostm1</b>    | Osteopetrosis associated                                                        | BA002 | 008_025_H18               | 0.003 | -0.634 |

|                  |                                                             |       |                           |       |        |
|------------------|-------------------------------------------------------------|-------|---------------------------|-------|--------|
|                  | transmembrane protein 1                                     |       |                           |       |        |
| <b>Pla2g4a</b>   | Phospholipase A2, group IVA (cytosolic, calcium-dependent)  | BA002 | 007_027_A02               | 0.000 | -0.635 |
| <i>Znf19</i>     | Zinc finger protein 19                                      | BA002 | 005-013D_A08_2006-11-18   | 0.043 | -0.636 |
| <i>Nola2</i>     | NHP2 ribonucleoprotein homolog                              | BA002 | 008B-001C_F04_2006-11-09  | 0.011 | -0.637 |
| <i>Gbe1</i>      | Glucan (1,4-alpha-), branching enzyme 1                     | BA002 | 013-007_K20               | 0.014 | -0.638 |
| <b>Nudt3</b>     | Nudix (nucleoside diphosphate linked moiety X)-type motif 3 | BA01  | UAhib_3067.y1_075         | 0.006 | -0.639 |
| <b>Tmbim4</b>    | Transmembrane BAX inhibitor motif containing 4              | BA01  | 004_004A_F07              | 0.005 | -0.639 |
| <i>Parp6</i>     | Poly (ADP-ribose) polymerase family, member 6               | BA002 | 005_007_E22               | 0.046 | -0.640 |
| <i>Pef1</i>      | Penta-EF-hand domain containing 1                           | BA002 | 007_001_A16               | 0.040 | -0.641 |
| <i>Ttl12</i>     | Tubulin tyrosine ligase-like family, member 12              | BA01  | 003_003C_F05              | 0.050 | -0.642 |
| <i>Hnrpk</i>     | Heterogeneous nuclear ribonucleoprotein K                   | BA002 | 007_031_I08               | 0.048 | -0.643 |
| <b>Cnot8</b>     | CCR4-NOT transcription complex, subunit 8                   | BA002 | 007_022_L05               | 0.008 | -0.645 |
| <i>Sec23b</i>    | Sec23 homolog B                                             | BA002 | 008_024_E03               | 0.033 | -0.645 |
| <i>Sec11a</i>    | SEC11 homolog A                                             | BA002 | 007_009_F16               | 0.034 | -0.646 |
| <i>Sorcs3</i>    | Sortilin-related VPS10 domain containing receptor 3         | BA002 | 007_003_B23               | 0.029 | -0.646 |
| <b>Sms</b>       | Spermine synthase                                           | BA01  | 05132004A_000_010A_C04_06 | 0.003 | -0.646 |
| <i>Oat</i>       | Ornithine aminotransferase                                  | BA01  | 003_001C_C07              | 0.017 | -0.648 |
| <i>Loc644961</i> | Actin, cytoplasmic 2-like                                   | BA01  | 05152004A_000_010D_G04_14 | 0.018 | -0.648 |
| <i>Rpl15</i>     | Ribosomal protein L15                                       | BA002 | 005-015A_B09_2006-10-25   | 0.039 | -0.648 |
| <i>Scarna2</i>   | Small Cajal body-specific RNA 2                             | BA002 | 007_005_A19               | 0.015 | -0.649 |
| <b>Ptpre</b>     | Protein tyrosine phosphatase, receptor type, E              | BA002 | 008_016_H04               | 0.010 | -0.650 |
| <i>Anxa6</i>     | Annexin A6                                                  | BA002 | 007_014_K12               | 0.047 | -0.652 |
| <i>Tapbp</i>     | Binding protein (tapasin)                                   | BA002 | 007_022_P14               | 0.022 | -0.653 |
| <b>Amica1</b>    | Adhesion molecule, interacts with CXADR antigen 1           | BA002 | 005-016D_F02_2006-11-10   | 0.003 | -0.653 |
| <i>Ppp1cc</i>    | Protein phosphatase 1, catalytic subunit, gamma isozyme     | BA002 | 008_016_H19               | 0.042 | -0.656 |
| <b>RbmX</b>      | RNA binding motif protein, X-linked                         | BA002 | 007_008_B11               | 0.008 | -0.657 |
| <i>M6pr</i>      | Mannose-6-phosphate receptor (cation dependent)             | BA002 | 005-017B_F02_2006-11-06   | 0.049 | -0.658 |
| <i>Rap1b</i>     | RAP1B, member of RAS oncogene family                        | BA01  | 004_003B_A05              | 0.028 | -0.659 |
| <i>Cisd2</i>     | CDGSH iron sulfur domain 2                                  | BA002 | 005-024D_A12_2006-12-16   | 0.044 | -0.660 |
| <i>PsmA4</i>     | Proteasome (prosome,                                        | BA002 | 005-016A_D09_2006-11-03   | 0.025 | -0.661 |

|                     |                                                                                    |       |                           |       |        |
|---------------------|------------------------------------------------------------------------------------|-------|---------------------------|-------|--------|
|                     | macropain) subunit, alpha type,<br>4                                               |       |                           |       |        |
| <b>Pafah1b2</b>     | Platelet-activating factor<br>acetylhydrolase 1b, catalytic<br>subunit 2           | BA002 | 008_024_F22               | 0.000 | -0.662 |
| <b>Pomp</b>         | Proteasome maturation protein                                                      | BA002 | 007_025_C17               | 0.005 | -0.662 |
| <b>Mrpl34</b>       | Mitochondrial ribosomal protein<br>L34                                             | BA002 | 007_003_J03               | 0.014 | -0.662 |
| <b>Slc27a5</b>      | Solute carrier family 27 (fatty<br>acid transporter), member 5                     | BA002 | 008_011_M20               | 0.022 | -0.665 |
| <b>Pafah1b1</b>     | Platelet-activating factor<br>acetylhydrolase 1b, regulatory<br>subunit 1          | BA002 | 005-025C_F12_2006-12-08   | 0.021 | -0.665 |
| <b>Adss</b>         | Adenylosuccinate synthase                                                          | BA002 | 008_003_J20               | 0.026 | -0.667 |
| <b>Bcap29</b>       | B-cell receptor-associated<br>protein 29                                           | BA002 | 005_005_H15               | 0.033 | -0.667 |
| <b>Mphosph6</b>     | M-phase phosphoprotein 6                                                           | BA002 | 008_024_E08               | 0.034 | -0.667 |
| <b>Spcs3</b>        | Signal peptidase complex<br>subunit 3 homolog                                      | BA002 | 007_008_P03               | 0.043 | -0.668 |
| <b>Fmnl1</b>        | Formin-like 1                                                                      | BA002 | 007_009_P11               | 0.000 | -0.670 |
| <b>C11orf73</b>     | Chromosome 11 open reading<br>frame 73                                             | BA002 | 005_007_B07               | 0.023 | -0.671 |
| <b>Nup62</b>        | Nucleoporin 62kda                                                                  | BA002 | 011-006_D19               | 0.003 | -0.673 |
| <b>St3gal5</b>      | ST3 beta-galactoside alpha-2,3-<br>sialyltransferase 5                             | BA002 | 007-019B_H10_2006-10-19a  | 0.003 | -0.674 |
| <b>Ostf1</b>        | Osteoclast stimulating factor 1                                                    | BA002 | 007_031_J09               | 0.050 | -0.675 |
| <b>Loc100131801</b> | Hypothetical protein<br>LOC100131801                                               | BA01  | 004_005A_D10              | 0.035 | -0.676 |
| <b>C10orf97</b>     | Family with sequence similarity<br>188, member A                                   | BA002 | 001_002B_A08              | 0.047 | -0.676 |
| <b>Gmfg</b>         | Glia maturation factor, gamma                                                      | BA002 | 008_014_A16               | 0.041 | -0.679 |
| <b>Wdr12</b>        | WD repeat domain 12                                                                | BA01  | 05152004A_000_010D_G10_14 | 0.001 | -0.679 |
| <b>Loc642384</b>    | Hypothetical LOC642384                                                             | BA01  | 004_005A_H10              | 0.043 | -0.680 |
| <b>Cacybp</b>       | Calcyclin binding protein                                                          | BA01  | TC626                     | 0.000 | -0.681 |
| <b>Ube2n</b>        | Ubiquitin-conjugating enzyme<br>E2N                                                | BA002 | 007_012_A17               | 0.001 | -0.681 |
| <b>Gpd2</b>         | Glycerol-3-phosphate<br>dehydrogenase 2<br>(mitochondrial)                         | BA002 | 007_012_E19               | 0.011 | -0.682 |
| <b>Dap3</b>         | Death associated protein 3                                                         | BA002 | 007_010_D13               | 0.014 | -0.682 |
| <b>Mrpl18</b>       | Mitochondrial ribosomal protein<br>L18                                             | BA002 | 008_027_G14               | 0.007 | -0.682 |
| <b>Gpx4</b>         | Glutathione peroxidase 4<br>(phospholipid hydroperoxidase)                         | BA002 | 007_005_M04               | 0.038 | -0.684 |
| <b>Mgat2</b>        | Mannosyl (alpha-1,6)-<br>glycoprotein beta-1,2-N-<br>acetylglucosaminyltransferase | BA002 | 008_022_E13               | 0.044 | -0.685 |



|                       |                                                                         |       |                           |       |        |
|-----------------------|-------------------------------------------------------------------------|-------|---------------------------|-------|--------|
| <i>Suclg2</i>         | Succinate-coa ligase, GDP-forming, beta subunit                         | BA002 | 008B-001A_C08_2006-10-30  | 0.015 | -0.685 |
| <i>U2af1</i>          | U2 small nuclear RNA auxiliary factor 1                                 | BA002 | 007_009_P21               | 0.047 | -0.685 |
| <b><i>Serpib1</i></b> | Serpin peptidase inhibitor, clade B (ovalbumin), member 1               | BA01  | UAhib_1296.y1_082         | 0.001 | -0.690 |
| <b><i>Chmp5</i></b>   | Chromatin modifying protein 5                                           | BA01  | TC168                     | 0.002 | -0.690 |
| <i>Pccb</i>           | Propionyl coa carboxylase, beta polypeptide                             | BA002 | 007_010_P19               | 0.032 | -0.692 |
| <i>Them2</i>          | Acyl-coa thioesterase 13                                                | BA002 | 005-013D_F01_2006-11-18   | 0.021 | -0.693 |
| <i>Aifm1</i>          | Apoptosis-inducing factor, mitochondrion-associated, 1                  | BA002 | 005_009_F16               | 0.015 | -0.694 |
| <b><i>Phf5a</i></b>   | PHD finger protein 5A                                                   | BA002 | 008_025_I07               | 0.001 | -0.695 |
| <i>Tmem93</i>         | Transmembrane protein 93                                                | BA002 | 007_011_C12               | 0.021 | -0.695 |
| <b><i>Stt3b</i></b>   | STT3, subunit of the oligosaccharyltransferase complex, homolog B       | BA01  | 05152004A_000_010D_B08_04 | 0.002 | -0.697 |
| <b><i>Aarsd1</i></b>  | Alanyl-trna synthetase domain containing 1                              | BA002 | 005_011_O04               | 0.010 | -0.697 |
| <i>Eno1</i>           | Enolase 1, (alpha)                                                      | BA002 | 005_009_C12               | 0.014 | -0.698 |
| <i>Trappc1</i>        | Trafficking protein particle complex 1                                  | BA002 | 007_031_I18               | 0.050 | -0.699 |
| <i>Tfg</i>            | TRK-fused gene                                                          | BA002 | 008_022_L21               | 0.037 | -0.700 |
| <i>Ca10</i>           | Carbonic anhydrase X                                                    | BA01  | 001_001B_G04              | 0.040 | -0.700 |
| <i>Eif4a2</i>         | Eukaryotic translation initiation factor 4A2                            | BA002 | 007_009_K21               | 0.013 | -0.704 |
| <b><i>Hnrnpc</i></b>  | Heterogeneous nuclear ribonucleoprotein C (C1/C2)                       | BA01  | 5222004_000_011D_D08_08   | 0.006 | -0.706 |
| <b><i>Cpsf3l</i></b>  | Cleavage and polyadenylation specific factor 3-like                     | BA002 | 008_005_K12               | 0.006 | -0.708 |
| <i>Xpo1</i>           | Exportin 1 (CRM1 homolog, yeast)                                        | BA002 | 007_008_H21               | 0.021 | -0.708 |
| <b><i>Stip1</i></b>   | Stress-induced-phosphoprotein 1                                         | BA002 | 007_023_D23               | 0.003 | -0.708 |
| <b><i>Alas1</i></b>   | Aminolevulinate, delta-, synthase 1                                     | BA002 | 005_011_I10               | 0.008 | -0.709 |
| <i>Rdm1</i>           | RAD52 motif 1                                                           | BA002 | 007_011_L23               | 0.042 | -0.710 |
| <b><i>Mklin1</i></b>  | Muskelin 1, intracellular mediator containing kelch motifs              | BA002 | 008_024_K04               | 0.000 | -0.711 |
| <b><i>Scpep1</i></b>  | Serine carboxypeptidase 1                                               | BA002 | 005-018B_E06_2006-10-13   | 0.005 | -0.711 |
| <i>Sdf2l1</i>         | Stromal cell-derived factor 2-like 1                                    | BA002 | 007-019C_E04_2006-10-17   | 0.011 | -0.714 |
| <i>Dpm1</i>           | Dolichyl-phosphate mannosyltransferase polypeptide 1, catalytic subunit | BA002 | 007_009_P02               | 0.015 | -0.714 |
| <i>Rpl10a</i>         | Ribosomal protein l10a                                                  | BA002 | 007_009_J23               | 0.018 | -0.714 |
| <b><i>Ormdl1</i></b>  | ORM1-like 1                                                             | BA002 | 008_012_N08               | 0.000 | -0.715 |

|                       |                                                                                |       |                          |       |        |
|-----------------------|--------------------------------------------------------------------------------|-------|--------------------------|-------|--------|
| <b><i>Psm1</i></b>    | Proteasome (prosome, macropain) subunit, alpha type, 1                         | BA002 | 007_020_M21              | 0.010 | -0.716 |
| <b><i>Mpp4</i></b>    | Membrane protein, palmitoylated 4 (MAGUK p55 subfamily member 4)               | BA002 | 007_015_O17              | 0.002 | -0.716 |
| <b><i>Polr2j</i></b>  | Polymerase (RNA) II (DNA directed) polypeptide J                               | BA002 | 007_007_P15              | 0.008 | -0.719 |
| <i>Eif3m</i>          | Eukaryotic translation initiation factor 3, subunit M                          | BA002 | 005-020B_C06_2006-11-08  | 0.017 | -0.720 |
| <b><i>Rap1a</i></b>   | RAP1A, member of RAS oncogene family                                           | BA002 | 008_004_N22              | 0.001 | -0.721 |
| <i>Fkbp4</i>          | FK506 binding protein 4                                                        | BA002 | 007-019D_D03_2006-11-01  | 0.018 | -0.722 |
| <i>Tmed2</i>          | Transmembrane emp24 domain trafficking protein 2                               | BA002 | 005_009_L15              | 0.032 | -0.724 |
| <i>Loc100129492</i>   | Small nuclear ribonucleoprotein Sm D1-like                                     | BA002 | 012-001D_G06_2007-05-04  | 0.045 | -0.726 |
| <i>Dusp11</i>         | Dual specificity phosphatase 11 (RNA/RNP complex 1-interacting)                | BA002 | 007_027_F21              | 0.012 | -0.729 |
| <i>Hipk1</i>          | Homeodomain interacting protein kinase 1                                       | BA002 | 007_004_O02              | 0.025 | -0.730 |
| <i>Fancl</i>          | Fanconi anemia, complementation group L                                        | BA002 | 007B-001A_E11_2006-10-19 | 0.020 | -0.733 |
| <i>Atp5o</i>          | ATP synthase, H <sup>+</sup> transporting, mitochondrial F1 complex, O subunit | BA002 | 007_022_O15              | 0.038 | -0.733 |
| <i>Vbp1</i>           | Von Hippel-Lindau binding protein 1                                            | BA01  | TC446                    | 0.039 | -0.735 |
| <b><i>Phyhip1</i></b> | Phytoanoyl-coa 2-hydroxylase interacting protein-like                          | BA002 | 007_013_J08              | 0.007 | -0.737 |
| <i>Npm1</i>           | Nucleophosmin (nucleolar phosphoprotein B23, numatrin)                         | BA01  | TC126                    | 0.015 | -0.738 |
| <i>Hspe1</i>          | Heat shock 10kda protein 1 (chaperonin 10)                                     | BA01  | TC556                    | 0.026 | -0.738 |
| <b><i>Sap18</i></b>   | Sin3A-associated protein                                                       | BA002 | 005-012C_D07_2006-11-28  | 0.001 | -0.738 |
| <i>Wdr68</i>          | DDB1 and CUL4 associated factor 7                                              | BA002 | 007_013_O13              | 0.029 | -0.740 |
| <i>Atp6v1e1</i>       | Atpase, H <sup>+</sup> transporting, lysosomal 31kda, V1 subunit E1            | BA01  | TC302                    | 0.022 | -0.742 |
| <b><i>Arhgap9</i></b> | Rho gtpase activating protein 9 Serine                                         | BA002 | 008_004_O08              | 0.009 | -0.742 |
| <i>Shmt2</i>          | hydroxymethyltransferase 2 (mitochondrial)                                     | BA002 | 008_013_B11              | 0.031 | -0.742 |
| <i>Sfrs2</i>          | Serine/arginine-rich splicing factor 2                                         | BA002 | 011-008_E20              | 0.031 | -0.742 |
| <i>Lsm14a</i>         | LSM14A, SCD6 homolog A                                                         | BA002 | 008_032_I14              | 0.012 | -0.744 |
| <i>Ak2</i>            | Adenylate kinase 2                                                             | BA002 | 008_010_H20              | 0.034 | -0.745 |

|                     |                                                                                              |       |                          |       |        |
|---------------------|----------------------------------------------------------------------------------------------|-------|--------------------------|-------|--------|
| <b>Enoph1</b>       | Enolase-phosphatase 1                                                                        | BA01  | 004_005C_E07             | 0.001 | -0.748 |
| <i>Fkbp5</i>        | FK506 binding protein 5                                                                      | BA002 | 005-024A_F03_2006-11-14  | 0.038 | -0.748 |
| <i>Pdk3</i>         | Pyruvate dehydrogenase kinase, isozyme 3                                                     | BA002 | 007_003_L06              | 0.031 | -0.748 |
| <i>Slc2a14</i>      | Solute carrier family 2 (facilitated glucose transporter), member 14                         | BA01  | 04122004_000-006A_F02_12 | 0.026 | -0.749 |
| <i>Tmsb4x</i>       | Thymosin beta 4, X-linked                                                                    | BA002 | 011-013_C10              | 0.040 | -0.752 |
| <i>Loc100133930</i> | D-2-hydroxyglutarate dehydrogenase, mitochondrial-like                                       | BA002 | 008_028_P13              | 0.014 | -0.754 |
| <b>Pgk1</b>         | Phosphoglycerate kinase 1                                                                    | BA002 | 007_001_L08              | 0.005 | -0.754 |
| <i>Nop5/nop58</i>   | NOP58 ribonucleoprotein homolog                                                              | BA002 | 007_028_P08              | 0.034 | -0.755 |
| <b>Agpat2</b>       | 1-acylglycerol-3-phosphate O-acyltransferase 2 (lysophosphatidic acid acyltransferase, beta) | BA002 | 008_011_D18              | 0.001 | -0.756 |
| <b>Ywhab</b>        | Tyrosine 3-monooxygenase/tryptophan 5-monooxygenase activation protein, beta polypeptide     | BA002 | 011-007_N12              | 0.010 | -0.757 |
| <i>Rab6a</i>        | RAB6A, member RAS oncogene family                                                            | BA01  | UAhib_0183.y1_091        | 0.011 | -0.757 |
| <i>Ch25h</i>        | Cholesterol 25-hydroxylase                                                                   | BA002 | 007_024_P10              | 0.012 | -0.760 |
| <b>Ppp1r12a</b>     | Protein phosphatase 1, regulatory (inhibitor) subunit 12A                                    | BA002 | 005-018B_F09_2006-10-13  | 0.003 | -0.760 |
| <b>C2orf25</b>      | Methylmalonic aciduria (cobalamin deficiency) cbld type, with homocystinuria                 | BA002 | 008_019_E17              | 0.008 | -0.761 |
| <i>Dera</i>         | Deoxyribose-phosphate aldolase (putative)                                                    | BA002 | 008_016_D05              | 0.013 | -0.762 |
| <i>Arfgef1</i>      | ADP-ribosylation factor guanine nucleotide-exchange factor 1(brefeldin A-inhibited)          | BA002 | 008_016_D14              | 0.011 | -0.763 |
| <i>Loc728851</i>    | Nonhistone chromosomal protein HMG-14                                                        | BA002 | 008_007_H19              | 0.032 | -0.764 |
| <i>Magoh</i>        | Mago-nashi homolog, proliferation-associated                                                 | BA002 | 008_025_E07              | 0.038 | -0.764 |
| <i>Rbx1</i>         | Ring-box 1, E3 ubiquitin protein ligase                                                      | BA002 | 005-023C_B01_2006-11-15  | 0.012 | -0.765 |
| <i>Arl6ip1</i>      | ADP-ribosylation factor-like 6 interacting protein 1                                         | BA002 | 007_030_O13              | 0.035 | -0.765 |
| <i>Atp6v0b</i>      | Atpase, H+ transporting, lysosomal 21kda, V0 subunit b                                       | BA002 | 008_002_K03              | 0.023 | -0.766 |
| <i>Abcd3</i>        | ATP-binding cassette, sub-family D (ALD), member 3                                           | BA002 | 008_018_H11              | 0.020 | -0.769 |

|                            |                                                                                          |       |                              |       |        |
|----------------------------|------------------------------------------------------------------------------------------|-------|------------------------------|-------|--------|
| <i>Alg8</i>                | Asparagine-linked glycosylation 8, alpha-1,3-glucosyltransferase homolog                 | BA002 | 007_007_P13                  | 0.037 | -0.769 |
| <b><i>Atad2</i></b>        | Atpase family, AAA domain containing 2                                                   | BA002 | 007_005_I18                  | 0.003 | -0.772 |
| <b><i>Txn</i></b>          | Thioredoxin                                                                              | BA01  | 004_004D_E04                 | 0.008 | -0.773 |
| <i>Dync1li1</i>            | Dynein, cytoplasmic 1, light intermediate chain 1                                        | BA002 | 008_004_K20                  | 0.045 | -0.775 |
| <i>Ap1g2</i>               | Adaptor-related protein complex 1, gamma 2 subunit                                       | BA002 | 007_024_D11                  | 0.026 | -0.778 |
| <b><i>Ahsa1</i></b>        | AHA1, activator of heat shock 90kda protein atpase homolog 1                             | BA002 | 005-002D-Anya_B11_2006-08-25 | 0.007 | -0.779 |
| <i>Cdc42se1</i>            | CDC42 small effector 1                                                                   | BA002 | 008_009_L18                  | 0.038 | -0.780 |
| <i>Mrpl12</i>              | Mitochondrial ribosomal protein L12                                                      | BA002 | 005_010_D24                  | 0.023 | -0.781 |
| <i>Pcsk5</i>               | Proprotein convertase subtilisin/kexin type 5                                            | BA002 | 013-003_G13                  | 0.014 | -0.783 |
| <b><i>Rrm1</i></b>         | Ribonucleotide reductase M1                                                              | BA01  | 004_004C_F01                 | 0.005 | -0.784 |
| <i>Hibch</i>               | 3-hydroxyisobutyryl-coa hydrolase                                                        | BA002 | 007_009_J22                  | 0.033 | -0.784 |
| <i>Snrpb</i>               | Small nuclear ribonucleoprotein polypeptides B and B1                                    | BA002 | 005_010_D05                  | 0.037 | -0.787 |
| <i>Prkacb</i>              | Protein kinase, camp-dependent, catalytic, beta                                          | BA002 | 005-002D-Anya_C02_2006-08-24 | 0.023 | -0.789 |
| <b><i>Arpc3</i></b>        | Actin related protein 2/3 complex, subunit 3                                             | BA01  | 04022004A_000_007D_B10_04    | 0.009 | -0.789 |
| <i>C9orf103</i>            | Chromosome 9 open reading frame 103                                                      | BA002 | 007_023_J02                  | 0.027 | -0.790 |
| <i>Ctss</i>                | Cathepsin S                                                                              | BA002 | 008_004_I19                  | 0.032 | -0.792 |
| <i>Gla</i>                 | Galactosidase, alpha                                                                     | BA002 | 008-001A_D06_2006-11-02      | 0.017 | -0.792 |
| <i>Ect2</i>                | Epithelial cell transforming sequence 2 oncogene                                         | BA002 | 008_005_K10                  | 0.047 | -0.792 |
| <i>Psmb6</i>               | Proteasome (prosome, macropain) subunit, beta type, 6                                    | BA002 | 008_008_L16a                 | 0.037 | -0.795 |
| <b><i>Doc2a</i></b>        | Double C2-like domains, alpha                                                            | BA002 | 007_006_E11                  | 0.009 | -0.797 |
| <i>Hnrpd</i>               | Heterogeneous nuclear ribonucleoprotein D (AU-rich element RNA binding protein 1, 37kda) | BA002 | 008_014_I15                  | 0.049 | -0.799 |
| <b><i>Loc100129907</i></b> | PYD and CARD domain containing                                                           | BA002 | 007_022_J19                  | 0.005 | -0.801 |
| <i>Spsb2</i>               | Spla/ryanodine receptor domain and SOCS box containing 2                                 | BA002 | 008B-001C_B08_2006-11-09     | 0.035 | -0.806 |
| <i>Nme1-nme2</i>           | NME1-NME2 readthrough                                                                    | BA002 | 008_012_K14                  | 0.030 | -0.808 |
| <i>Napsb</i>               | Napsin B aspartic peptidase pseudogene                                                   | BA002 | 008_006_D06                  | 0.030 | -0.810 |
| <i>Cox8a</i>               | Cytochrome c oxidase subunit VIIIA (ubiquitous)                                          | BA002 | 005_009_N12                  | 0.016 | -0.811 |

|                       |                                                                   |       |                               |       |        |
|-----------------------|-------------------------------------------------------------------|-------|-------------------------------|-------|--------|
| <i>Ppih</i>           | Peptidylprolyl isomerase H (cyclophilin H)                        | BA002 | 011-013_I23                   | 0.026 | -0.811 |
| <b><i>Drp2</i></b>    | Dystrophin related protein 2                                      | BA002 | 007_013_K24                   | 0.003 | -0.812 |
| <i>Map4k2</i>         | Mitogen-activated protein kinase kinase kinase 2                  | BA002 | 007_030_G23                   | 0.023 | -0.814 |
| <b><i>Cct6a</i></b>   | Chaperonin containing TCP1, subunit 6A (zeta 1)                   | BA002 | 008_029_J13                   | 0.004 | -0.816 |
| <i>Rpl9</i>           | Ribosomal protein L9                                              | BA002 | 007_012_C02                   | 0.021 | -0.817 |
| <i>Vamp8</i>          | Vesicle-associated membrane protein 8 (endobrevin)                | BA002 | 005_011_J08                   | 0.045 | -0.818 |
| <i>Tmx1</i>           | Thioredoxin-related transmembrane protein 1                       | BA002 | 008_013_M10                   | 0.030 | -0.819 |
| <i>Stag2</i>          | Stromal antigen 2                                                 | BA002 | 007_011_K06                   | 0.032 | -0.820 |
| <b><i>Pmch</i></b>    | Pro-melanin-concentrating hormone                                 | BA002 | 007_015_H04                   | 0.002 | -0.820 |
| <i>Abce1</i>          | ATP-binding cassette, sub-family E (OABP), member 1               | BA002 | 007_029_A18                   | 0.011 | -0.821 |
| <i>Rps11</i>          | Ribosomal protein S11                                             | BA002 | 011-012_N18                   | 0.014 | -0.821 |
| <b><i>Masp2</i></b>   | Mannan-binding lectin serine peptidase 2                          | BA002 | 008_015_G12                   | 0.007 | -0.822 |
| <i>Hspa5</i>          | Heat shock 70kda protein 5 (glucose-regulated protein, 78kda)     | BA01  | TC339                         | 0.035 | -0.822 |
| <i>Eif3e</i>          | Eukaryotic translation initiation factor 3, subunit E             | BA002 | 005-002D-Any_a_D08_2006-08-25 | 0.024 | -0.823 |
| <b><i>Calm2</i></b>   | Calmodulin 2 (phosphorylase kinase, delta)                        | BA01  | TC104                         | 0.006 | -0.823 |
| <b><i>Nutf2</i></b>   | Nuclear transport factor 2                                        | BA002 | 007_023_K01                   | 0.005 | -0.824 |
| <b><i>Tmem30a</i></b> | Transmembrane protein 30A                                         | BA002 | 007_005_C17                   | 0.006 | -0.828 |
| <b><i>Sft2d2</i></b>  | SFT2 domain containing 2                                          | BA002 | 008_028_M22                   | 0.003 | -0.830 |
| <i>Snap23</i>         | Synaptosomal-associated protein                                   | BA002 | 005_005_M21                   | 0.020 | -0.831 |
| <i>Mrpl32</i>         | Mitochondrial ribosomal protein L32                               | BA002 | 008-001B_B06_2006-10-27       | 0.012 | -0.832 |
| <b><i>Acly</i></b>    | ATP citrate lyase                                                 | BA002 | 008_005_B21                   | 0.006 | -0.834 |
| <b><i>Gimap5</i></b>  | Gtpase, IMAP family member 5                                      | BA002 | 008_008_O23                   | 0.006 | -0.834 |
| <i>Btrc</i>           | Beta-transducin repeat containing                                 | BA002 | 008_022_O06                   | 0.035 | -0.834 |
| <i>Exo1</i>           | Exonuclease 1                                                     | BA01  | 05132004A_000_010A_H04_16     | 0.020 | -0.835 |
| <b><i>Ssu72</i></b>   | SSU72 RNA polymerase II CTD phosphatase homolog                   | BA002 | 008_012_I04                   | 0.001 | -0.836 |
| <b><i>Chordc1</i></b> | Cysteine and histidine-rich domain (CHORD)-containing 1           | BA01  | 12162003a_000_004_E12_E12_10  | 0.010 | -0.840 |
| <i>B4galt6</i>        | UDP-Gal:betaglcnaac beta 1,4-galactosyltransferase, polypeptide 6 | BA002 | 007_009_H02                   | 0.024 | -0.843 |
| <i>Arf4</i>           | ADP-ribosylation factor 4                                         | BA002 | 007_004_K12                   | 0.021 | -0.845 |

|                         |                                                                                                   |       |                           |       |        |
|-------------------------|---------------------------------------------------------------------------------------------------|-------|---------------------------|-------|--------|
| <i>Zmat2</i>            | Zinc finger, matrin-type 2                                                                        | BA002 | 006-001A_C10_2006-10-10   | 0.012 | -0.847 |
| <i>Snrpd3</i>           | Small nuclear ribonucleoprotein D3 polypeptide 18kda                                              | BA002 | 005-024C_F05_2006-11-30   | 0.037 | -0.847 |
| <i>Smarca5</i>          | SWI/SNF related, matrix associated, actin dependent regulator of chromatin, subfamily a, member 5 | BA002 | 007_002_M20               | 0.031 | -0.847 |
| <b><i>Cdc42</i></b>     | Cell division cycle 42 (GTP binding protein, 25kda)                                               | BA002 | 007_015_H02               | 0.000 | -0.848 |
| <b><i>Derl2</i></b>     | Der1-like domain family, member 2                                                                 | BA002 | 005-021B_D03_2006-12-06   | 0.001 | -0.848 |
| <b><i>Metap2</i></b>    | Methionyl aminopeptidase 2                                                                        | BA01  | 05202004A_000_011B_B11_03 | 0.002 | -0.849 |
| <b><i>Znrf2</i></b>     | Zinc and ring finger 2                                                                            | BA002 | 008_015_E19               | 0.000 | -0.850 |
| <b><i>Prr13</i></b>     | Proline rich 13                                                                                   | BA002 | 005-015A_H05_2006-10-25   | 0.004 | -0.850 |
| <i>Fcn1</i>             | Ficolin (collagen/fibrinogen domain containing) 1                                                 | BA002 | 005_007_J23               | 0.041 | -0.852 |
| <b><i>Chfr</i></b>      | Checkpoint with forkhead and ring finger domains                                                  | BA002 | 008B-001B_F10_2006-10-28  | 0.009 | -0.852 |
| <i>C6orf62</i>          | Chromosome 6 open reading frame 62                                                                | BA002 | 008_005_L24               | 0.042 | -0.852 |
| <b><i>Ppa1</i></b>      | Pyrophosphatase (inorganic) 1                                                                     | BA01  | 05222004_000_011C_H03_15  | 0.003 | -0.852 |
| <i>Dkc1</i>             | Dyskeratosis congenita 1, dyskerin                                                                | BA002 | 007_026_B23               | 0.017 | -0.854 |
| <i>Rnf10</i>            | Ring finger protein 10                                                                            | BA01  | 05012004_000_009C_E11_09  | 0.040 | -0.857 |
| <i>Loc440926</i>        | Histone H3.3-like                                                                                 | BA01  | UAhib_0194.y1_086         | 0.035 | -0.857 |
| <b><i>Ppp2r1b</i></b>   | Protein phosphatase 2, regulatory subunit A, beta                                                 | BA002 | 007_027_I05               | 0.009 | -0.861 |
| <b><i>Ugt3a2</i></b>    | UDP glycosyltransferase 3 family, polypeptide A2                                                  | BA002 | 008_019_F10               | 0.007 | -0.863 |
| <i>Myliip</i>           | Myosin regulatory light chain interacting protein                                                 | BA002 | 008_002_M11               | 0.031 | -0.864 |
| <i>Tubb</i>             | Tubulin, beta                                                                                     | BA01  | TC84                      | 0.021 | -0.866 |
| <i>Ppia</i>             | Peptidylprolyl isomerase A (cyclophilin A)                                                        | BA002 | 008_004_F04               | 0.016 | -0.868 |
| <b><i>Hspa8</i></b>     | Heat shock 70kda protein 8                                                                        | BA01  | TC199                     | 0.000 | -0.868 |
| <b><i>Tmem50b</i></b>   | Transmembrane protein 50B                                                                         | BA002 | 014-001A_H09_2007-06-12   | 0.005 | -0.869 |
| <i>Ltb4dh</i>           | Prostaglandin reductase 1                                                                         | BA002 | 008_004_O13               | 0.024 | -0.870 |
| <i>Ilk</i>              | Integrin-linked kinase                                                                            | BA002 | 007_012_O05               | 0.012 | -0.871 |
| <b><i>Loc729505</i></b> | Non-histone chromosomal protein HMG-17-like                                                       | BA01  | 004_003C_H07              | 0.004 | -0.874 |
| <i>Atg3</i>             | ATG3 autophagy related 3 homolog                                                                  | BA002 | 007B-001A_F09_2006-10-19  | 0.013 | -0.874 |
| <b><i>Bclaf1</i></b>    | BCL2-associated transcription factor 1                                                            | BA002 | 011-007_O13               | 0.001 | -0.878 |
| <b><i>Mrpl20</i></b>    | Mitochondrial ribosomal protein L20                                                               | BA002 | 005_010_E20               | 0.003 | -0.880 |
| <b><i>Fcer1g</i></b>    | Fc fragment of ige, high affinity I,                                                              | BA002 | 005-012A_A11_2006-11-15   | 0.009 | -0.884 |

|                  |                                                                           |       |                          |       |        |
|------------------|---------------------------------------------------------------------------|-------|--------------------------|-------|--------|
|                  | receptor for; gamma polypeptide                                           |       |                          |       |        |
| <b>Taf13</b>     | TAF13 RNA polymerase II, TATA box binding protein (TBP)-associated factor | BA002 | 007_005_M22              | 0.003 | -0.886 |
| <b>Cops2</b>     | COP9 constitutive photomorphogenic homolog subunit 2 (Arabidopsis)        | BA002 | 013-002_G01              | 0.002 | -0.886 |
| <i>Tram1</i>     | Translocation associated membrane protein 1                               | BA002 | 008_031_D09              | 0.028 | -0.887 |
| <b>Tmco1</b>     | Transmembrane and coiled-coil domains 1                                   | BA01  | TC341                    | 0.002 | -0.888 |
| <i>Fam96a</i>    | Family with sequence similarity 96, member A                              | BA002 | 005-014A_C01_2006-11-02  | 0.014 | -0.889 |
| <b>Omg</b>       | Oligodendrocyte myelin glycoprotein                                       | BA002 | 007-019C_H02_2006-10-17  | 0.006 | -0.891 |
| <b>Clic1</b>     | Chloride intracellular channel 1                                          | BA002 | 011-004_B16              | 0.010 | -0.893 |
| <i>Dpyd</i>      | Dihydropyrimidine dehydrogenase                                           | BA002 | 008_015_K05              | 0.017 | -0.898 |
| <i>Loc642103</i> | Similar to Maltase-glucoamylase                                           | BA002 | 008_016_I03              | 0.047 | -0.898 |
| <b>Calr</b>      | Calreticulin                                                              | BA002 | 008_032_N03              | 0.009 | -0.901 |
| <i>Fbxo9</i>     | F-box protein 9                                                           | BA002 | 007_008_C20              | 0.037 | -0.903 |
| <i>Epsti1</i>    | Epithelial stromal interaction 1                                          | BA002 | 008_032_C09              | 0.021 | -0.904 |
| <i>Nxt2</i>      | Nuclear transport factor 2-like export factor 2                           | BA01  | 05222004_000_011C_A03_01 | 0.025 | -0.905 |
| <i>C5orf30</i>   | Chromosome 5 open reading frame 30                                        | BA01  | 04122004_000-006A_G01_13 | 0.026 | -0.905 |
| <i>Ckap2</i>     | Cytoskeleton associated protein 2                                         | BA01  | 05222004_000_011C_D03_07 | 0.047 | -0.907 |
| <i>Skiv2l</i>    | Superkiller viralicidic activity 2-like                                   | BA002 | 008B-001B_A02_2006-10-28 | 0.029 | -0.910 |
| <i>Hnrpm</i>     | Heterogeneous nuclear ribonucleoprotein M                                 | BA002 | 011-016_O04              | 0.033 | -0.916 |
| <i>Cap1</i>      | CAP, adenylate cyclase-associated protein 1                               | BA002 | 009-001D_E01_2007-02-24  | 0.027 | -0.918 |
| <b>Atp6v0e1</b>  | Atpase, H <sup>+</sup> transporting, lysosomal 9kda, V0 subunit e1        | BA002 | 007_008_C05              | 0.009 | -0.926 |
| <b>Psm14</b>     | Proteasome (prosome, macropain) 26S subunit, non-atpase, 14               | BA002 | 011-005_D14              | 0.005 | -0.928 |
| <i>Coro1a</i>    | Coronin, actin binding protein, 1A                                        | BA002 | 007_012_O16              | 0.015 | -0.929 |
| <b>Cdc2l5</b>    | Cyclin-dependent kinase 13                                                | BA002 | 011-013_N17              | 0.000 | -0.934 |
| <b>Cyb5b</b>     | Cytochrome b5 type B (outer mitochondrial membrane)                       | BA002 | 007_025_L14              | 0.009 | -0.935 |
| <b>Mtdh</b>      | Metadherin                                                                | BA002 | 007_022_C21              | 0.001 | -0.935 |
| <b>Elovl6</b>    | ELOVL family member 6, elongation of long chain fatty                     | BA002 | 008_016_E14              | 0.004 | -0.940 |

|                |                                                                                          |       |                              |       |        |
|----------------|------------------------------------------------------------------------------------------|-------|------------------------------|-------|--------|
|                | acids                                                                                    |       |                              |       |        |
| <b>Dhfr</b>    | Dihydrofolate reductase                                                                  | BA002 | 008_019_P12                  | 0.006 | -0.941 |
| <b>Cbx3</b>    | Chromobox homolog 3                                                                      | BA002 | 008_005_J08                  | 0.034 | -0.948 |
| <b>Tuba1b</b>  | Tubulin, alpha 1b                                                                        | BA01  | TC517                        | 0.039 | -0.949 |
| <b>Cep27</b>   | HAUS augmin-like complex, subunit 2                                                      | BA002 | 007_005_K11                  | 0.012 | -0.951 |
| <b>Ugp2</b>    | UDP-glucose pyrophosphorylase 2                                                          | BA002 | 008_008_L06                  | 0.006 | -0.951 |
| <b>Tkt</b>     | Transketolase                                                                            | BA002 | 005-023C_F07_2006-11-15      | 0.018 | -0.952 |
| <b>Vamp5</b>   | Vesicle-associated membrane protein 5 (myobrevin)                                        | BA002 | 005-012C_E08_2006-11-28      | 0.002 | -0.952 |
| <b>Hmgb1</b>   | High-mobility group box 1                                                                | BA01  | 01082004A_000_002_F10_F10_12 | 0.027 | -0.954 |
| <b>Isy1</b>    | ISY1 splicing factor homolog                                                             | BA002 | 006-001A_C08_2006-10-10      | 0.012 | -0.961 |
| <b>Calm3</b>   | Calmodulin 3 (phosphorylase kinase, delta)                                               | BA002 | 011-011_B18                  | 0.005 | -0.963 |
| <b>Cdkn3</b>   | Cyclin-dependent kinase inhibitor 3                                                      | BA002 | 008_013_L10                  | 0.033 | -0.965 |
| <b>Actr3</b>   | ARP3 actin-related protein 3 homolog                                                     | BA002 | 007_005_O06                  | 0.022 | -0.966 |
| <b>Ap3s1</b>   | Adaptor-related protein complex 3, sigma 1 subunit                                       | BA002 | 008_021_P12                  | 0.029 | -0.970 |
| <b>Ywhaz</b>   | Tyrosine 3-monooxygenase/tryptophan 5-monooxygenase activation protein, zeta polypeptide | BA002 | 013-002_H16                  | 0.015 | -0.971 |
| <b>Gadd45a</b> | Growth arrest and DNA-damage-inducible, alpha                                            | BA002 | 005-023A_H04_2006-11-09      | 0.011 | -0.979 |
| <b>Gimap7</b>  | Gtpase, IMAP family member 7                                                             | BA002 | 008_015_F13                  | 0.011 | -0.985 |
| <b>Rad21</b>   | RAD21 homolog                                                                            | BA002 | 008_005_A16                  | 0.032 | -0.990 |
| <b>Tubb2c</b>  | Tubulin, beta 2C                                                                         | BA01  | TC413                        | 0.037 | -0.993 |
| <b>Fam49b</b>  | Family with sequence similarity 49, member B                                             | BA002 | 007_022_C14                  | 0.047 | -0.996 |
| <b>Casp7</b>   | Caspase 7, apoptosis-related cysteine peptidase                                          | BA002 | 008_015_D13                  | 0.022 | -1.000 |
| <b>Ran</b>     | RAN, member RAS oncogene family                                                          | BA01  | UAhib_0866.y1_077            | 0.001 | -1.000 |
| <b>Acs14</b>   | Acyl-coa synthetase long-chain family member 4                                           | BA01  | TC558                        | 0.023 | -1.001 |
| <b>Mki67ip</b> | MKI67 (FHA domain) interacting nucleolar phosphoprotein                                  | BA002 | 007-019D_G04_2006-11-01      | 0.038 | -1.005 |
| <b>Fbl</b>     | Fibrillarlin                                                                             | BA002 | 008_002_F24                  | 0.012 | -1.006 |
| <b>Hagh</b>    | Hydroxyacylglutathione hydrolase                                                         | BA002 | 008_009_F11                  | 0.000 | -1.007 |
| <b>Cdk2ap2</b> | Cyclin-dependent kinase 2 associated protein 2                                           | BA002 | 007_004_O07                  | 0.000 | -1.010 |
| <b>Tmem33</b>  | Transmembrane protein 33                                                                 | BA002 | 007_004_P15                  | 0.001 | -1.014 |
| <b>Nap1l1</b>  | Nucleosome assembly protein 1-                                                           | BA002 | 007_008_O14                  | 0.016 | -1.016 |



|                  |                                                                                             |       |                         |       |        |
|------------------|---------------------------------------------------------------------------------------------|-------|-------------------------|-------|--------|
|                  | like 1                                                                                      |       |                         |       |        |
| <b>Gtf2a2</b>    | General transcription factor IIA, 2                                                         | BA002 | 008_005_E12             | 0.007 | -1.021 |
| <i>Loc653566</i> | Signal peptidase complex subunit 2-like                                                     | BA002 | 005-022C_D05_2006-11-22 | 0.019 | -1.023 |
| <i>Rcan2</i>     | Regulator of calcineurin 2                                                                  | BA002 | TC6006                  | 0.045 | -1.030 |
| <i>Igll1</i>     | Immunoglobulin lambda-like polypeptide 1                                                    | BA002 | 007_009_E09             | 0.011 | -1.031 |
| <b>Cp</b>        | Ceruloplasmin (ferroxidase)                                                                 | BA002 | 008_028_J14             | 0.005 | -1.033 |
| <b>Pccb</b>      | Propionyl coa carboxylase, beta polypeptide                                                 | BA002 | 007_004_J18             | 0.001 | -1.033 |
| <b>Fos</b>       | FBJ murine osteosarcoma viral oncogene homolog                                              | BA002 | 005-021A_B08_2006-11-01 | 0.004 | -1.044 |
| <b>Pik3cb</b>    | Phosphoinositide-3-kinase, catalytic, beta polypeptide                                      | BA002 | 007_006_G10             | 0.006 | -1.044 |
| <b>B3gnt2</b>    | UDP-glcnac:betagal beta-1,3-N-acetylglucosaminyltransferase 2                               | BA002 | 008_016_O16             | 0.000 | -1.044 |
| <b>Capza1</b>    | Capping protein (actin filament) muscle Z-line, alpha 1                                     | BA002 | 007_010_J10             | 0.006 | -1.045 |
| <i>Plp2</i>      | Proteolipid protein 2 (colonic epithelium-enriched)                                         | BA002 | 007_002_G07             | 0.013 | -1.047 |
| <i>Slc43a3</i>   | Solute carrier family 43, member 3                                                          | BA002 | 008_028_C09             | 0.022 | -1.050 |
| <b>Hmgn2</b>     | High-mobility group nucleosomal binding domain 2                                            | BA01  | UAhib_1774.y1_078       | 0.002 | -1.051 |
| <i>Arhgdib</i>   | Rho GDP dissociation inhibitor (GDI) beta                                                   | BA002 | 008_021_G21             | 0.017 | -1.053 |
| <i>Mbd2</i>      | Methyl-cpg binding domain protein 2                                                         | BA002 | 008_004_M22             | 0.014 | -1.054 |
| <i>Hspd1</i>     | Heat shock 60kda protein 1                                                                  | BA01  | UAhib_1847.y1_036       | 0.025 | -1.059 |
| <i>Hsph1</i>     | Heat shock 105kda/110kda protein 1                                                          | BA002 | 007-019D_D10_2006-11-01 | 0.015 | -1.072 |
| <b>Ghitm</b>     | Growth hormone inducible transmembrane protein                                              | BA002 | 008_007_K05             | 0.001 | -1.080 |
| <b>Actr2</b>     | ARP2 actin-related protein 2 homolog                                                        | BA002 | 008_031_A09             | 0.005 | -1.081 |
| <b>Kiaa1949</b>  | Kiaa1949                                                                                    | BA002 | 008_013_A23             | 0.008 | -1.085 |
| <b>Mtmr14</b>    | Myotubularin related protein 14                                                             | BA002 | 008_011_E24             | 0.002 | -1.087 |
| <i>Cybb</i>      | Cytochrome b-245, beta polypeptide                                                          | BA002 | 008_006_E09             | 0.035 | -1.089 |
| <b>Slc25a5</b>   | Solute carrier family 25 (mitochondrial carrier; adenine nucleotide translocator), member 5 | BA002 | 005_009_B04             | 0.010 | -1.093 |
| <i>Farsb</i>     | Phenylalanyl-trna synthetase, beta subunit                                                  | BA002 | 007_023_O23             | 0.023 | -1.101 |
| <i>Gpr177</i>    | Wntless homolog (G protein-coupled receptor 177)                                            | BA002 | 007_006_H17             | 0.013 | -1.103 |

|                  |                                                                    |       |                           |       |        |
|------------------|--------------------------------------------------------------------|-------|---------------------------|-------|--------|
| <b>C20orf3</b>   | Chromosome 20 open reading frame 3                                 | BA002 | 008_016_A05               | 0.006 | -1.103 |
| <i>Snx25</i>     | Sorting nexin 25                                                   | BA01  | 05222004_000_011C_G03_13  | 0.041 | -1.111 |
| <i>Glul</i>      | Glutamate-ammonia ligase                                           | BA002 | 005-013C_A07_2006-12-09   | 0.039 | -1.111 |
| <i>Rexo2</i>     | REX2, RNA exonuclease 2 homolog                                    | BA002 | 007_002_H10               | 0.043 | -1.112 |
| <i>Pygl</i>      | Phosphorylase, glycogen                                            | BA002 | 007_028_K14               | 0.012 | -1.113 |
| <b>C1qa</b>      | Complement component 1, q subcomponent, A chain                    | BA002 | 007-019D_F07_2006-11-01   | 0.002 | -1.116 |
| <b>Nuf2</b>      | NUF2, NDC80 kinetochore complex component, homolog                 | BA01  | 03312004_000_007A_D10_08  | 0.004 | -1.118 |
| <b>Canx</b>      | Calnexin                                                           | BA002 | 005-012A_H03_2006-11-15   | 0.002 | -1.123 |
| <i>Ube2s</i>     | Ubiquitin-conjugating enzyme E2S                                   | BA002 | 005-023C_F11_2006-11-16   | 0.022 | -1.129 |
| <i>Tpx2</i>      | TPX2, microtubule-associated, homolog                              | BA01  | 05202004A_000_011B_F05_11 | 0.035 | -1.130 |
| <i>Fcn2</i>      | Ficolin (collagen/fibrinogen domain containing lectin) 2 (hucolin) | BA002 | 008_013_G13               | 0.024 | -1.131 |
| <i>Cpd</i>       | Carboxypeptidase D                                                 | BA01  | 05152004_000_010C_G08_14  | 0.025 | -1.136 |
| <i>Stmn1</i>     | Stathmin 1                                                         | BA01  | TC92                      | 0.022 | -1.145 |
| <i>Qpct</i>      | Glutaminyl-peptide cyclotransferase                                | BA002 | 007_023_H03               | 0.028 | -1.146 |
| <i>Tmem14c</i>   | Transmembrane protein 14C                                          | BA002 | 005_006_K07               | 0.012 | -1.148 |
| <i>Ucp2</i>      | Uncoupling protein 2 (mitochondrial, proton carrier)               | BA002 | 008_002_F21               | 0.024 | -1.153 |
| <b>Arpc5</b>     | Actin related protein 2/3 complex, subunit 5                       | BA002 | 007_009_B20               | 0.006 | -1.160 |
| <b>Loc646839</b> | Tropomyosin 3                                                      | BA002 | 007_007_P08               | 0.001 | -1.167 |
| <b>Spg21</b>     | Spastic paraplegia 21 (autosomal recessive, Mast syndrome)         | BA002 | 007_021_M05               | 0.002 | -1.173 |
| <b>Tegt</b>      | Transmembrane BAX inhibitor motif containing 6                     | BA01  | TC293                     | 0.005 | -1.177 |
| <b>Syncrip</b>   | Synaptotagmin binding, cytoplasmic RNA interacting protein         | BA002 | 011-008_N20               | 0.003 | -1.178 |
| <b>C14orf147</b> | Chromosome 14 open reading frame 147                               | BA002 | 005-018D_G08_2006-10-25   | 0.002 | -1.186 |
| <b>Rogdi</b>     | Rogdi homolog                                                      | BA002 | 005-022C_C01_2006-11-22   | 0.009 | -1.193 |
| <i>Atp6v1c1</i>  | Atpase, H+ transporting, lysosomal 42kda, V1 subunit C1            | BA002 | 007_033_K08               | 0.011 | -1.196 |
| <b>Atp6v1a</b>   | Atpase, H+ transporting, lysosomal 70kda, V1 subunit A             | BA002 | 007_004_K07               | 0.008 | -1.225 |
| <i>Top2a</i>     | Topoisomerase (DNA) II alpha                                       | BA01  | 05142004_000_010B_D10_08  | 0.029 | -1.225 |
| <b>Erp29</b>     | Endoplasmic reticulum protein 29                                   | BA002 | 005_008_H24               | 0.001 | -1.228 |
| <b>Mgst1</b>     | Microsomal glutathione S-                                          | BA002 | 008_013_I09               | 0.008 | -1.230 |

|                     |                                                                                             |       |                             |       |        |
|---------------------|---------------------------------------------------------------------------------------------|-------|-----------------------------|-------|--------|
|                     | transferase 1                                                                               |       |                             |       |        |
| <b>Prdx5</b>        | Peroxiredoxin 5                                                                             | BA002 | 007-019C_C06_2006-10-17a    | 0.007 | -1.245 |
| <i>Tloc1</i>        | SEC62 homolog                                                                               | BA002 | 011-012_H12                 | 0.031 | -1.245 |
| <i>Mobkl1b</i>      | MOB1, Mps One Binder kinase activator-like 1B                                               | BA002 | 008_005_H07                 | 0.045 | -1.248 |
| <i>Nek2</i>         | NIMA (never in mitosis gene a)-related kinase 2                                             | BA01  | 02102004_000_005A_B9_B09_03 | 0.038 | -1.251 |
| <i>Ptma</i>         | Prothymosin, alpha                                                                          | BA002 | 007_005_G22                 | 0.012 | -1.254 |
| <b>Memo1</b>        | Mediator of cell motility 1                                                                 | BA002 | 008_005_P19                 | 0.006 | -1.261 |
| <b>Glrx</b>         | Glutaredoxin (thioltransferase)                                                             | BA002 | 005-012C_A07_2006-11-28     | 0.002 | -1.263 |
| <b>H2afz</b>        | H2A histone family, member Z                                                                | BA002 | 007_002_D06                 | 0.008 | -1.277 |
| <b>Cd47</b>         | CD47 molecule                                                                               | BA002 | 008_020_E07                 | 0.001 | -1.300 |
| <b>Dad1</b>         | Defender against cell death 1                                                               | BA002 | 007_003_F16                 | 0.002 | -1.306 |
| <i>Hnrnpa2b1</i>    | Heterogeneous nuclear ribonucleoprotein A2/B1                                               | BA002 | 011-004_D22                 | 0.015 | -1.308 |
| <b>Ube2t</b>        | Ubiquitin-conjugating enzyme E2T                                                            | BA002 | 007_022_M10                 | 0.006 | -1.311 |
| <i>Mboat2</i>       | Membrane bound O-acyltransferase domain containing 2                                        | BA002 | 007_007_G12                 | 0.025 | -1.350 |
| <i>Cnih4</i>        | Cornichon homolog 4                                                                         | BA002 | 007_029_F08                 | 0.019 | -1.377 |
| <i>Hmgb3</i>        | High-mobility group box 3                                                                   | BA002 | 005-018D_F07_2006-10-25     | 0.018 | -1.404 |
| <b>Kpna2</b>        | Karyopherin alpha 2 (RAG cohort 1, importin alpha 1)                                        | BA002 | 008_022_M22                 | 0.008 | -1.405 |
| <i>Hnrpf</i>        | Heterogeneous nuclear ribonucleoprotein F                                                   | BA002 | 008_002_J07                 | 0.038 | -1.420 |
| <i>Cfl1</i>         | Cofilin 1                                                                                   | BA002 | 007_005_F22                 | 0.012 | -1.429 |
| <i>Psmf1</i>        | Proteasome (prosome, macropain) inhibitor subunit 1 (PI31)                                  | BA01  | 004_001D_H08                | 0.029 | -1.434 |
| <b>Acss1</b>        | Acyl-coa synthetase short-chain family member 1                                             | BA002 | 008_021_H03                 | 0.006 | -1.436 |
| <i>Loc100133188</i> | Acyl-coa desaturase (Stearoyl-coa desaturase) (Fatty acid desaturase) (Delta(9)-desaturase) | BA01  | 03312004A_000_007B_H11_15   | 0.014 | -1.483 |
| <b>Oxct1</b>        | 3-oxoacid coa transferase 1                                                                 | BA01  | 05152004_000_010C_A09_01    | 0.002 | -1.488 |
| <b>Ccl15</b>        | Chemokine (C-C motif) ligand 15                                                             | BA002 | 008_028_I17                 | 0.001 | -1.538 |
| <i>Sri</i>          | Sorcin                                                                                      | BA002 | 007_020_E11                 | 0.017 | -1.544 |
| <i>Dut</i>          | Deoxyuridine triphosphatase                                                                 | BA002 | 005-024D_A08_2006-12-15     | 0.031 | -1.567 |
| <b>Dgat2</b>        | Diacylglycerol O-acyltransferase 2                                                          | BA002 | 007_014_K18                 | 0.004 | -1.589 |
| <b>Maob</b>         | Monoamine oxidase B                                                                         | BA002 | 008_013_B02                 | 0.006 | -1.591 |
| <i>Hmgb2</i>        | High-mobility group box 2                                                                   | BA01  | 12162003_000_003_A4_A04_02  | 0.025 | -1.617 |
| <i>Hpcal1</i>       | Hippocalcin-like 1                                                                          | BA002 | 007_021_K23                 | 0.028 | -1.777 |
| <b>Pfn1</b>         | Profilin 1                                                                                  | BA002 | 005_005_D19                 | 0.004 | -1.807 |

|                     |                              |       |                            |       |        |
|---------------------|------------------------------|-------|----------------------------|-------|--------|
| <b>Loc100130890</b> | Heat shock protein 67B2-like | BA002 | 007_007_L11                | 0.000 | -1.860 |
| <b>Srgn</b>         | Serglycin                    | BA002 | 008_030_B09                | 0.002 | -1.863 |
| <b>Pcm1</b>         | Pericentriolar material 1    | BA01  | 01082004_000_001_F5_F05_11 | 0.024 | -2.131 |

---
